# Supplementary material for: Eliminating host-guest incompatibility via enzyme mining enables the high-temperature production of N-acetylglucosamine
Source: PubMed Central journal article supplement — iScience. 2022 Dec 9;26(1):105774. doi: 10.1016/j.isci.2022.105774 (PMC9829697; doi:10.1016/j.isci.2022.105774), 2022-12-09
Supplement: mmc1.pdf [file mmc1.pdf]

iScience, Volume 26

## **Supplemental information**

### **Eliminating host-guest incompatibility via enzyme mining enables the high-temperature production of *N*-acetylglucosamine**

**Yutong Wu, Jiongqin Liu, Xiao Han, Xuanlin Meng, Mengke Li, Jing Wang, Hongsong Xue, Yuhan Yang, Ping Xu, and Fei Tao**

Supplemental Information  
Supplementary Figures

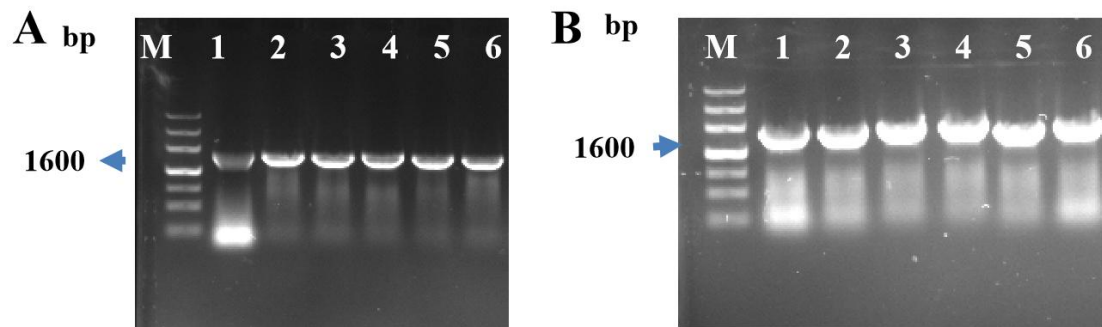

**Figure S1. Analysis of the constructed plasmids by restriction enzyme digestion, related to Figure 3.**

(A) M, marker; 1-3 analysis of pKVM $\Delta$ *gamA*; 4-6 analysis of pKVM $\Delta$ *nagAB*

(B) M, marker; 1-3 analysis of pKVM $\Delta$ *nagP1*; 4-6 analysis of pKVM $\Delta$ *nagP2*

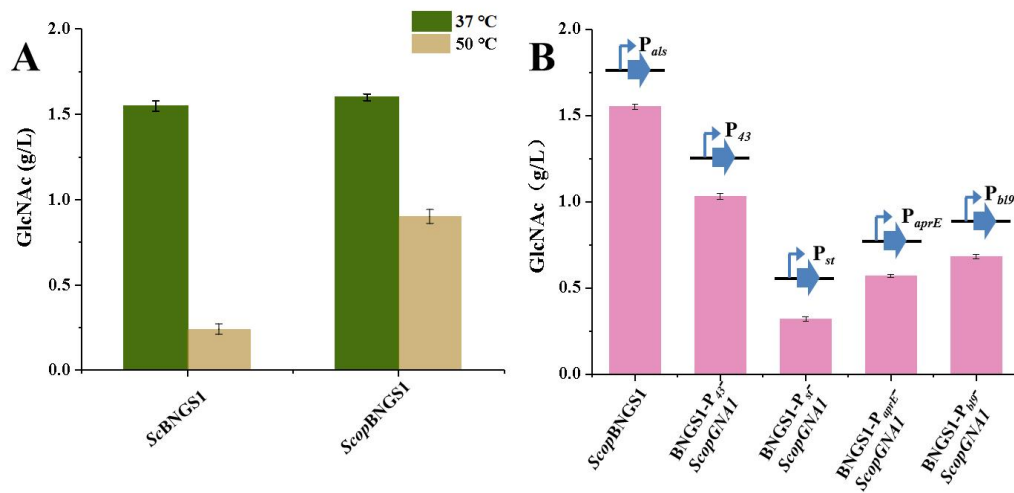

**Figure S2. Codon optimization and promoter screening, related to Figure 3.**

(A) Shake flask fermentation of ScBNGS1 and ScopBNGS1 at 37°C and 50°C.

(B) Different promoter screening at 37°C.

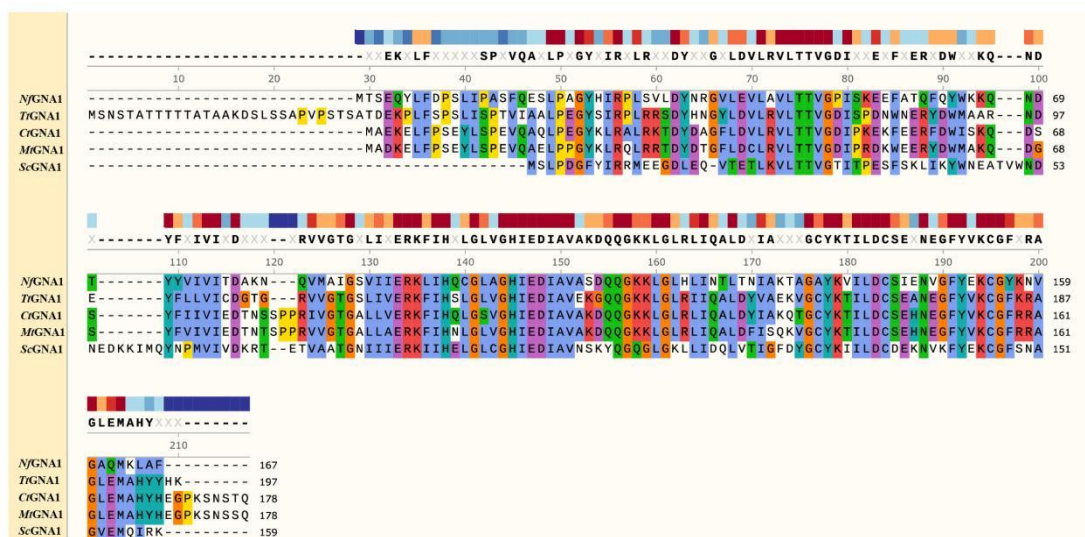

Figure S3. Multiple alignment of *ScGNA1* with *TtGNA1*, *CtGNA1*, *MtGNA1*, and *NjGNA1*, related to Figure 2, Figure 3 and Figure 4.

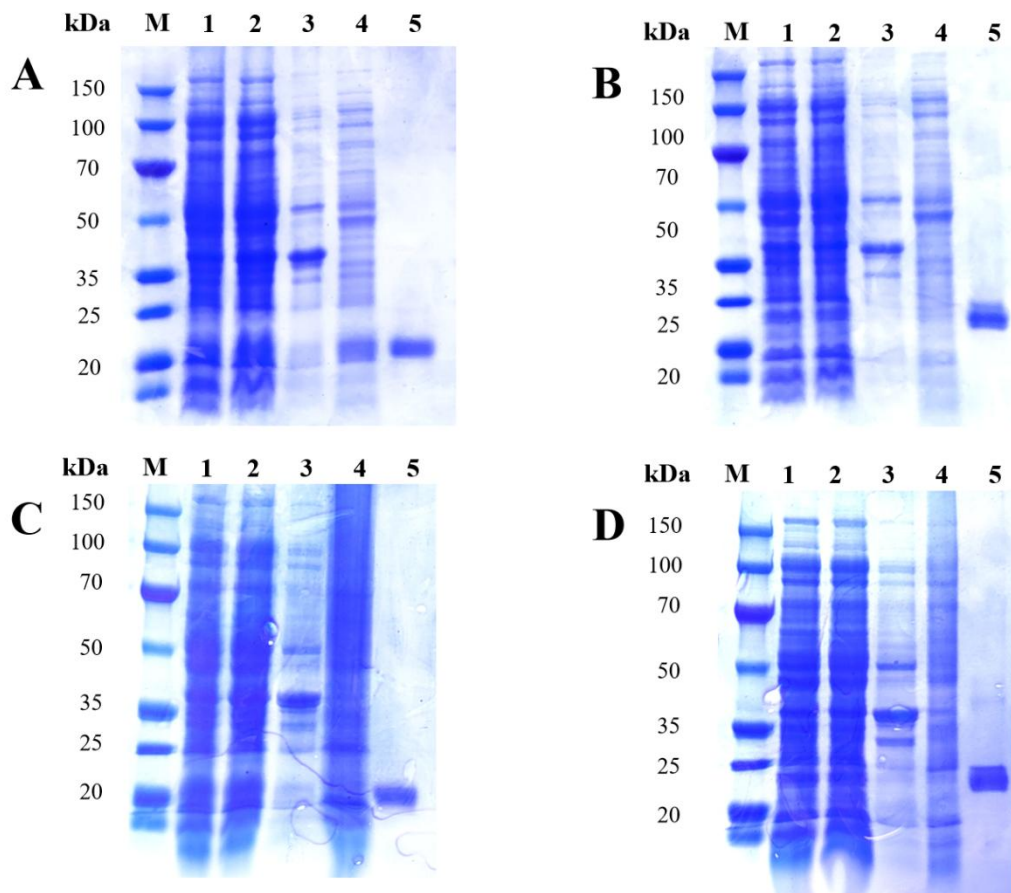

**Figure S4. Purification of *TtGNA1*, *CtGNA1*, *MtGNA1*, and *NfGNA1*, related to Figure 4.**

(A) SDS-PAGE of purified *NfGNA1*. Lane M, marker; lane 1, cell disruption solution of *NfGNA1*; lane 2, precipitation of induced cell lysate; lane 3, supernatant of induced cell lysate; lane 4, Elute *NfGNA1* with 50mM imidazole; lane 5, Elute *NfGNA1* with 200mM imidazole.

(B) SDS-PAGE of purified *CtGNA1*. Lane M, marker; lane 1, cell disruption solution of *CtGNA1*; lane 2, precipitation of induced cell lysate; lane 3, supernatant of induced cell lysate; lane 4, Elute *CtGNA1* with 50mM imidazole; lane 5, Elute *CtGNA1* with 200mM imidazole.

(C) SDS-PAGE of purified *MtGNA1*. Lane M, marker; lane 1, cell disruption solution of *MtGNA1*; lane 2, precipitation of induced cell lysate; lane 3, supernatant of induced cell lysate; lane 4, Elute *MtGNA1* with 50mM imidazole; lane 5, Elute *MtGNA1* with 200mM imidazole.

(D) Elute *TtGNA1* with 200mM imidazole; lane 6, cell disruption solution of *TtGNA1*; lane 7, precipitation of induced cell lysate; lane 8, supernatant of induced cell lysate; lane 4, Elute *TtGNA1* with 50mM imidazole; lane 5, Elute *TtGNA1* with 200mM imidazole.

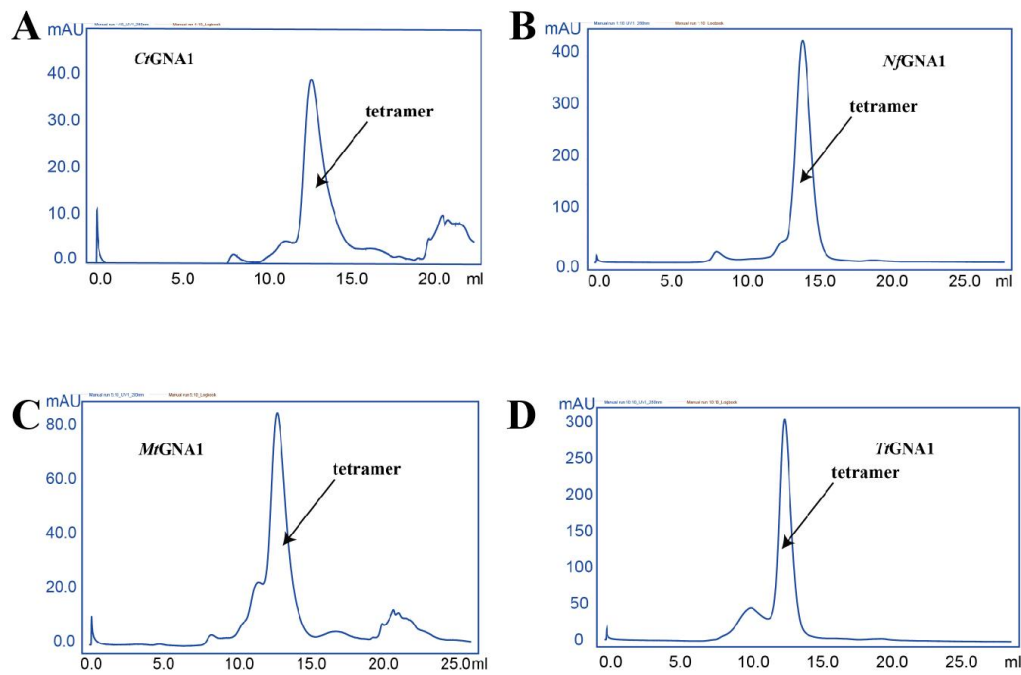

**Figure S5. Analysis of size exclusion chromatography on Superdex 200 (ÄTKA purifier) of CtGNA1, NfGNA1, MtGNA1, and TfGNA1, related to Figure 4 and Figure 5.**

Each of the elution volume of CtGNA1, NfGNA1, MtGNA1, and TfGNA1 is 13.7 mL, 14 mL, 13.7 mL and 13.6 mL, respectively. The equations for the molecular masses of the standard proteins were used versus their elution volume values:  $y = -0.31427x + 1.89014$ ,  $x = \lg M_r$ ,  $y = K_{av} (V_e - V_o) / (V_c - V_o)$ .

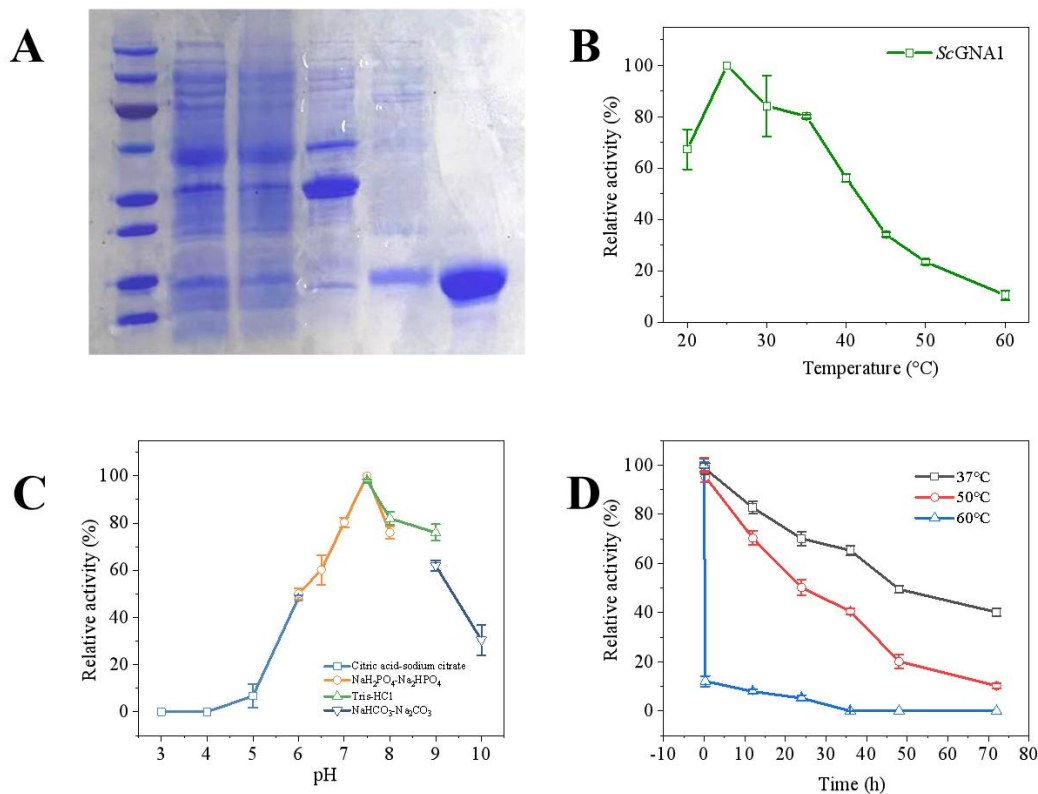

**Figure S6. Activity assay of ScGNA1, related to Figure 4.**

(A) SDS-PAGE of purified ScGNA1. Lane M, marker; lane 1, cell disruption solution of ScGNA1; lane 2, precipitation of induced cell lysate; lane 3, supernatant of induced cell lysate; lane 4, Elute ScGNA1 with 50mM imidazole; lane 5, Elute ScGNA1 with 200mM imidazole.

(B) Effects of temperature on the activities of ScGNA1.

(C) Effects of pH on activities of ScGNA1. Square, citric acid-sodium citrate; Triangle, NaH<sub>2</sub>PO<sub>4</sub>-Na<sub>2</sub>HPO<sub>4</sub>; Rhombus, Tris-HCl; Star, NaHCO<sub>3</sub>-Na<sub>2</sub>CO<sub>3</sub>.

(D) Thermal stability of ScGNA1 at 37°C, 50°C, and 60°C.

Triplicate experiments were carried out for physiological measurements, and error bars represent standard deviation.

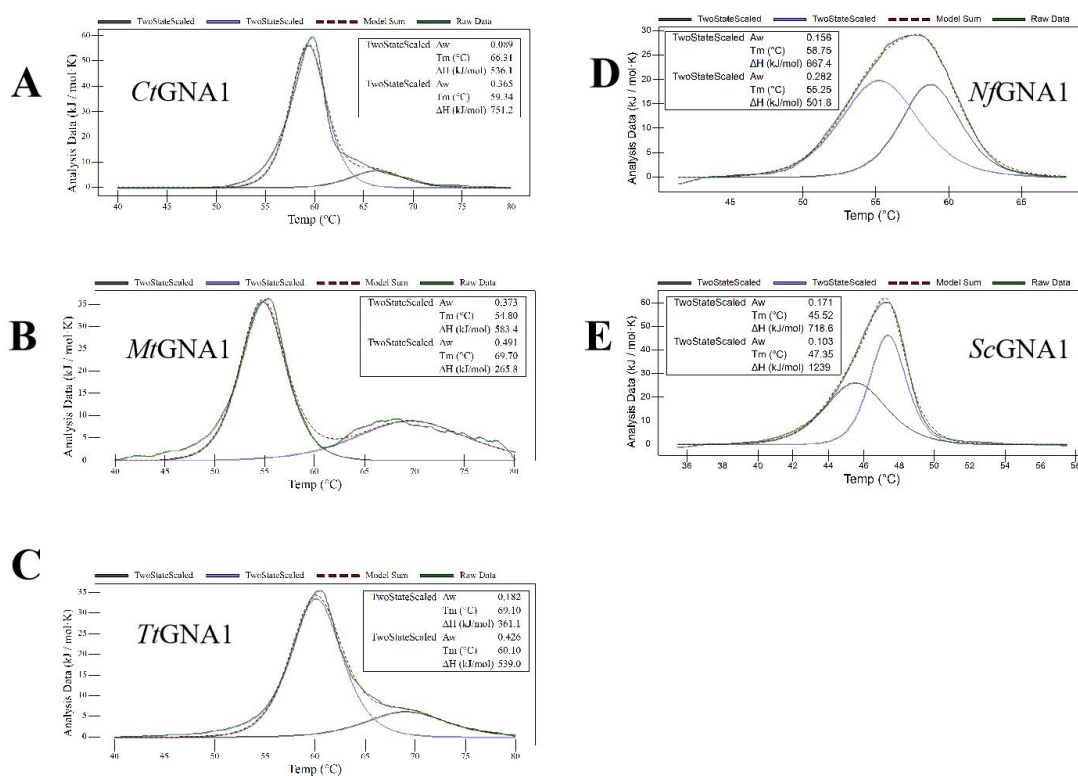

**Figure S7. Protein thermostability tests for *CtGNA1*, *MtGNA1*, *TtGNA1*, *NfGNA1*, and *ScGNA1* using nano differential scanning calorimeter (Nano DSC, the TA instruments, USA), related to Figure 4.**



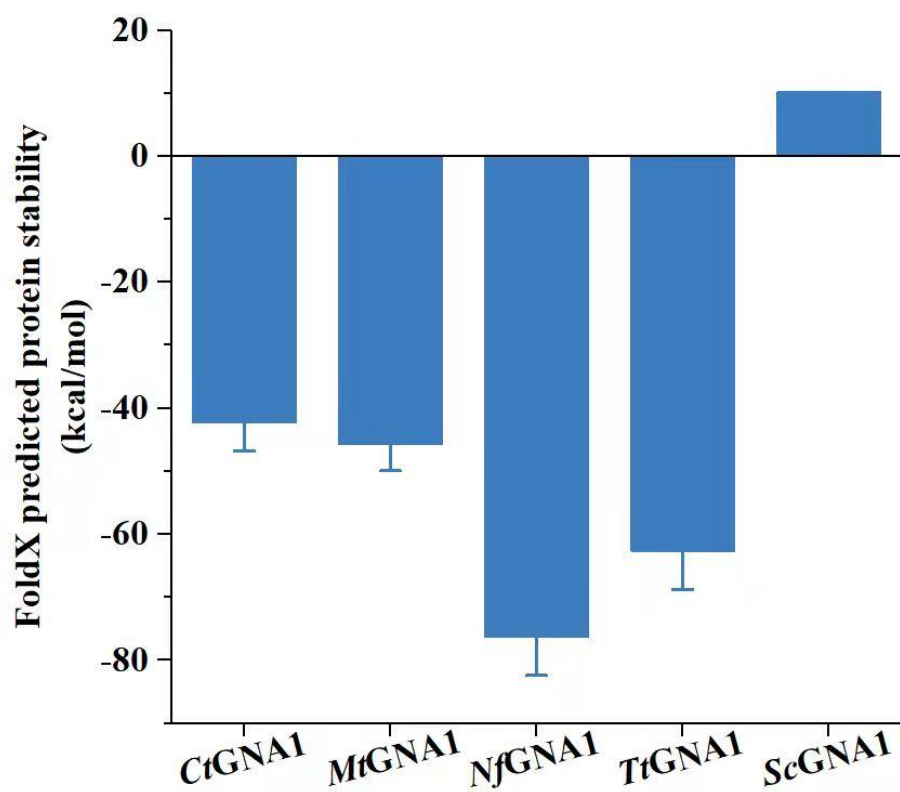

Figure S8. Protein stability prediction of *TtGNA1*, *MtGNA1*, *NfGNA1*, *CtGNA1*, and *ScGNA1* based on FoldX, related to Figure 5.

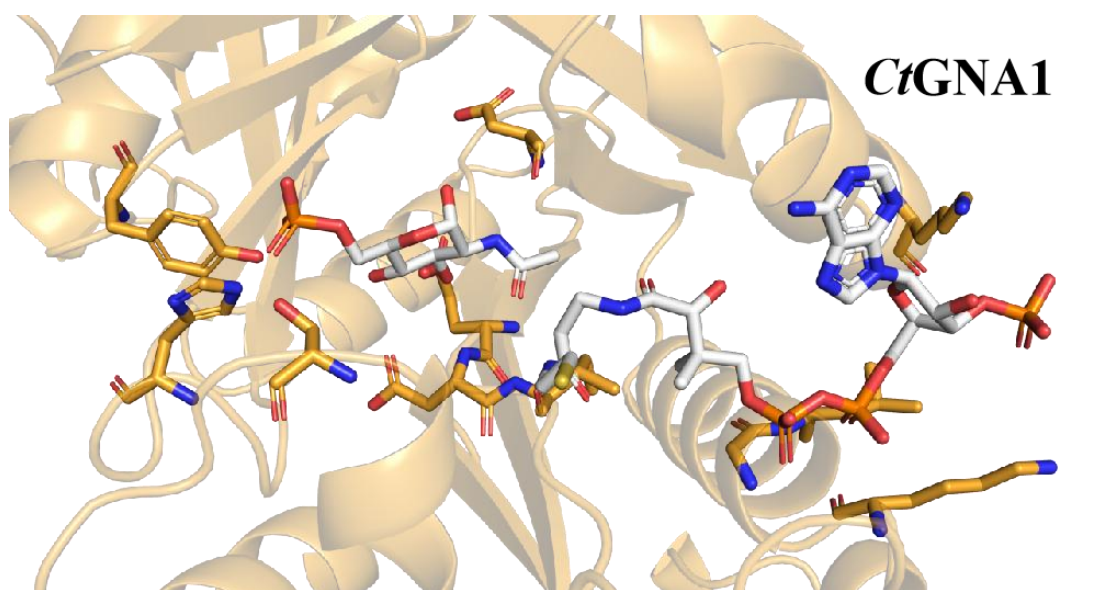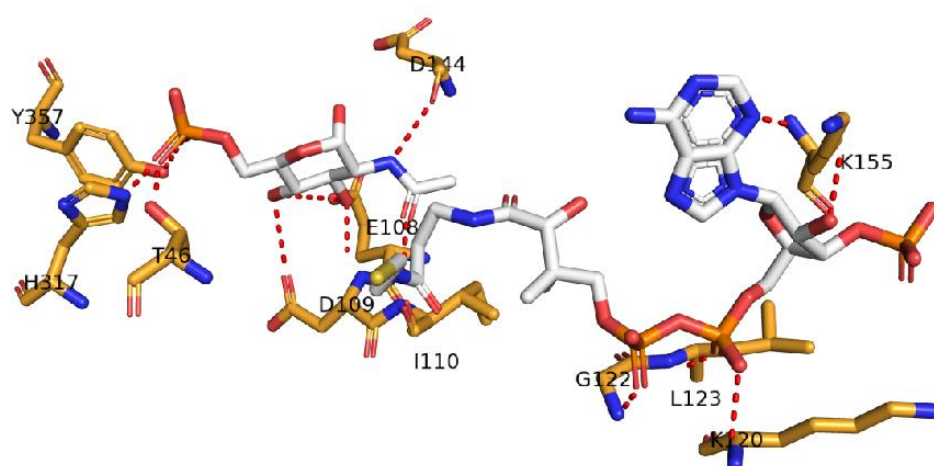

**Figure S9.** Calculated the number of hydrogen bonds bound to the products CoA and GlcNAc-6P for CtGNA1, related to Figure 5.

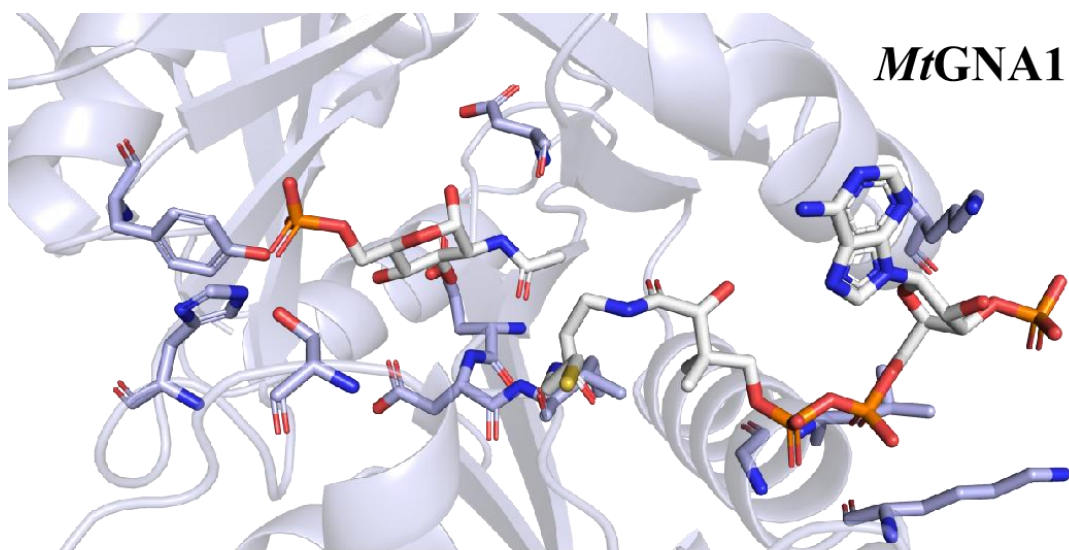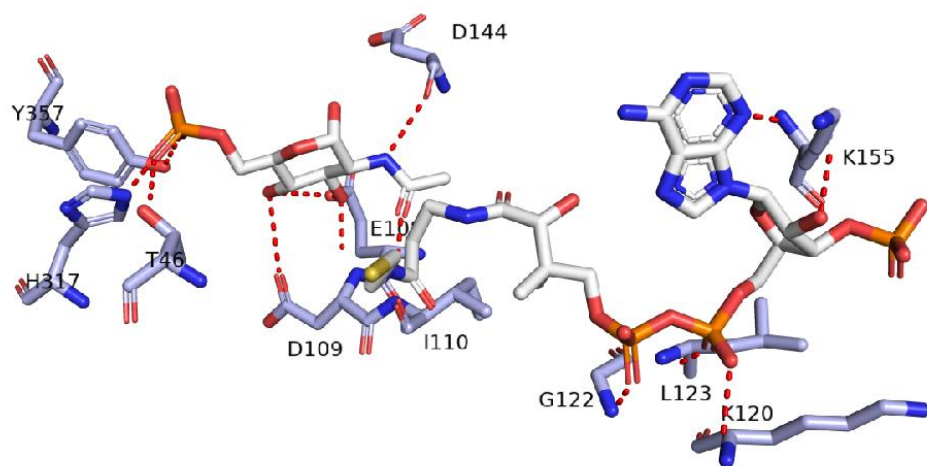

Figure S10. Calculated the number of hydrogen bonds bound to the products CoA and GlcNAc-6P for *MtGNA1*, related to Figure 5.

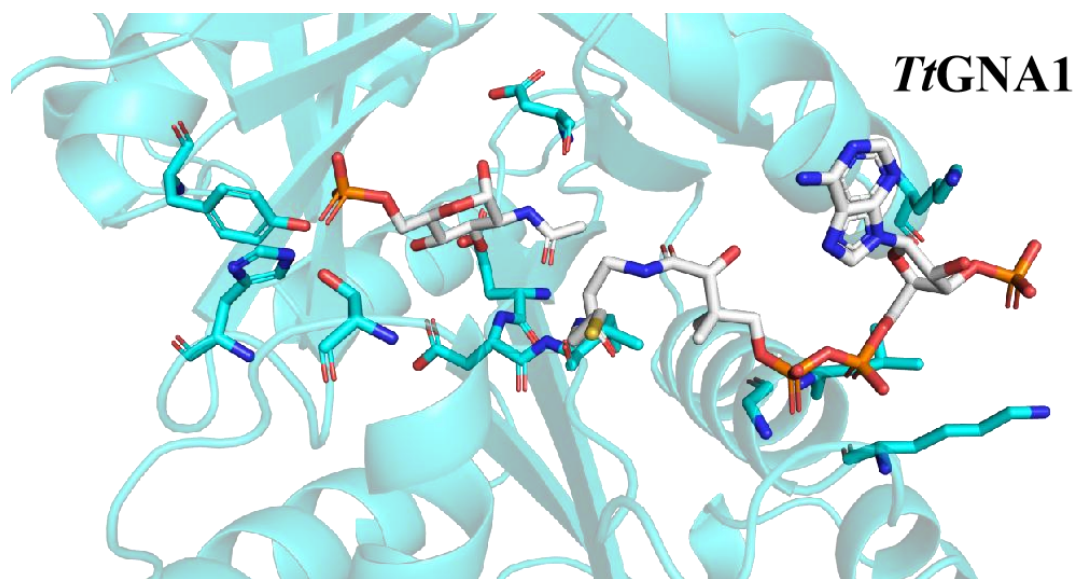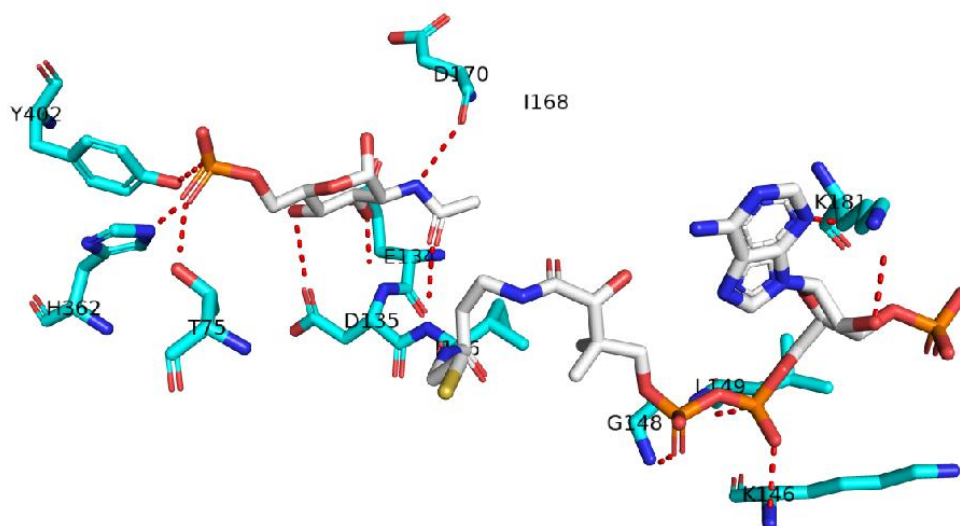

**Figure S11.** Calculated the number of hydrogen bonds bound to the products CoA and GlcNAc-6P for *TtGNA1*, related to Figure 5.

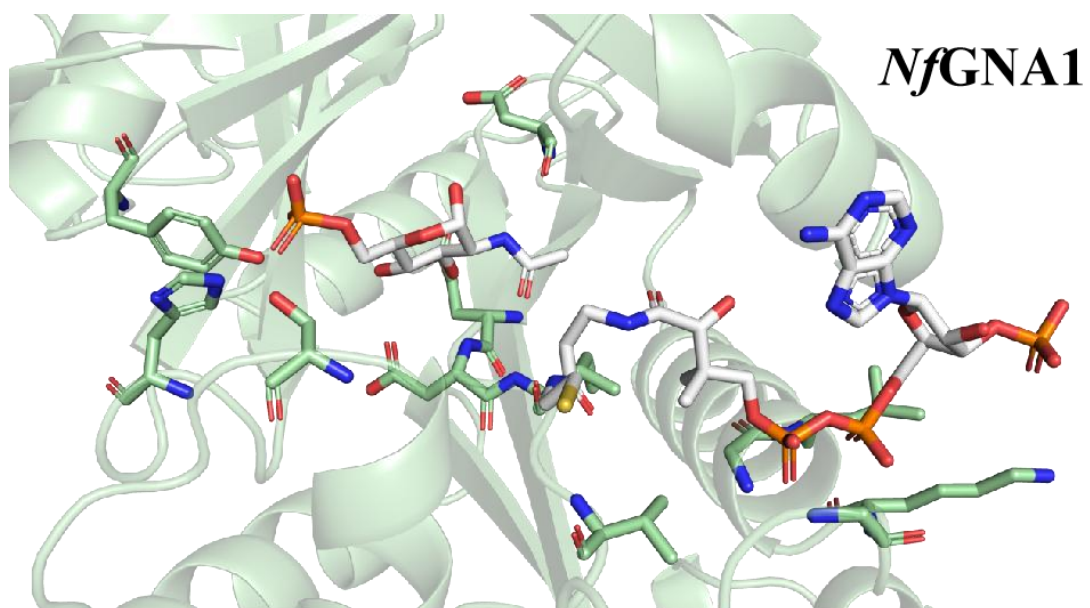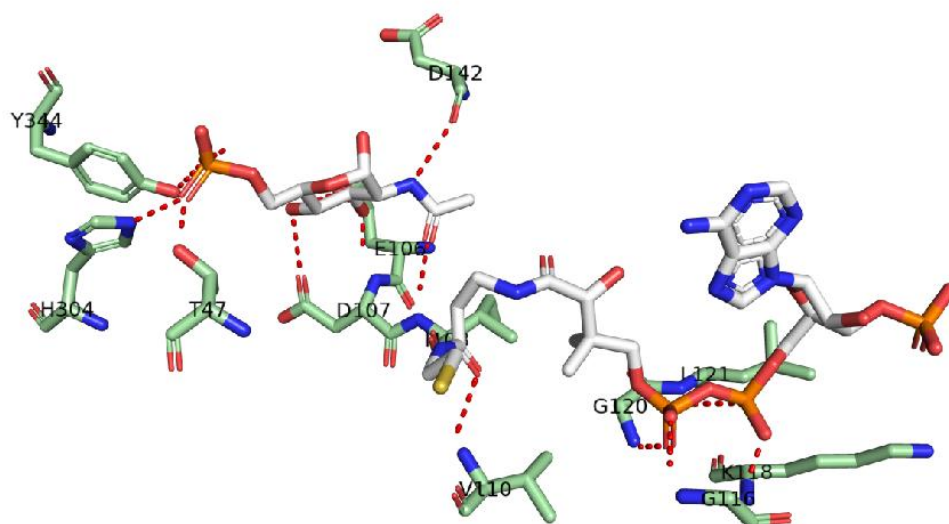

Figure S12. Calculated the number of hydrogen bonds bound to the products CoA and GlcNAc-6P for *NfGNA1*, related to Figure 5.

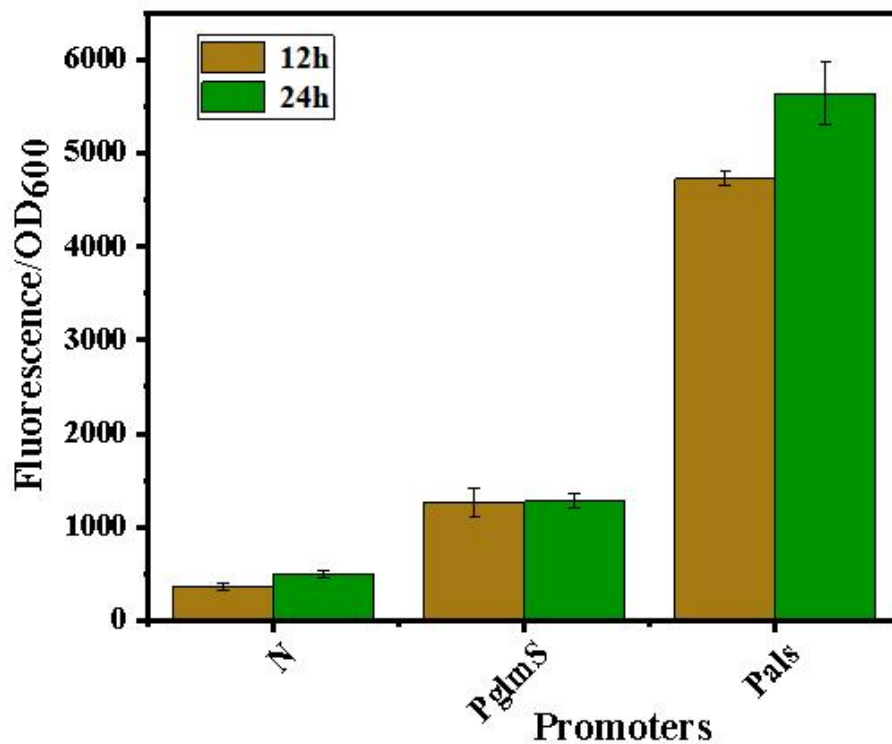

**Figure S13. Characterization of  $P_{als}$  and  $P_{glmS}$  promoters in *B.licheniformis* MW3, related to Figure 5.**

The strength of the promoters was characterized using *SfGFP* as a reporter. N, negative control (promoter-less vector pPHY300PLK). The fluorescence intensities were measured when the bacteria were cultured for 12h and 24h, respectively. The shake-flask fermentation medium was used for the experiment.



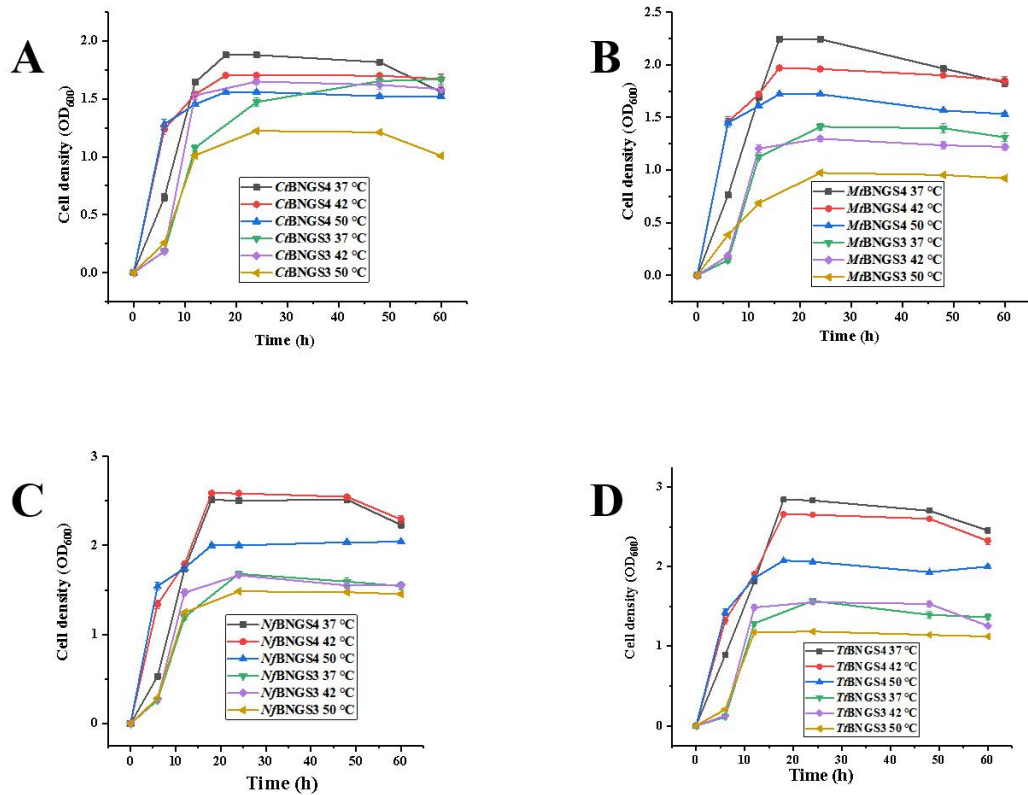

**Figure S14. Bacterial growth curve determination in shake flasks, related to Figure 7.**

- (A) Growth curve of shake-flask fermentation for *Ct*BNGS3 and *Ct*BNGS4.
- (B) Growth curve of shake-flask fermentation for *Mt*BNGS3 and *Mt*BNGS4.
- (C) Growth curve of shake-flask fermentation for *Nt*BNGS3 and *Nt*BNGS4.
- (D) Growth curve of shake-flask fermentation for *Tt*BNGS3 and *Tt*BNGS4.

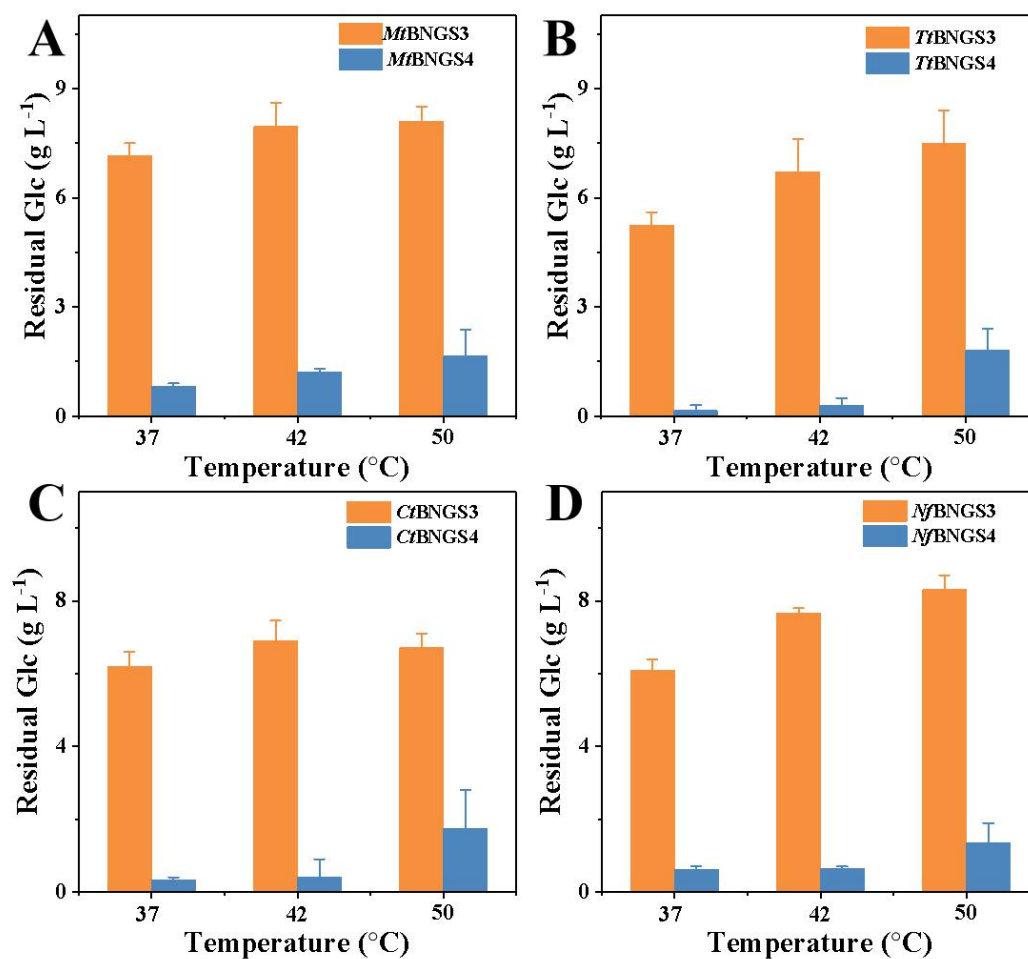

**Figure S15. The residual glucose detection in shake flasks, related to Figure 7.**

- (A) The residual glucose of shake-flask fermentation for *Mt*BNGS3 and *Mt*BNGS4.
- (B) The residual glucose of shake-flask fermentation for *Tt*BNGS3 and *Tt*BNGS4.
- (C) The residual glucose of shake-flask fermentation for *Ct*BNGS3 and *Ct*BNGS4.
- (D) The residual glucose of shake-flask fermentation for *Nt*BNGS3 and *Nt*BNGS4.



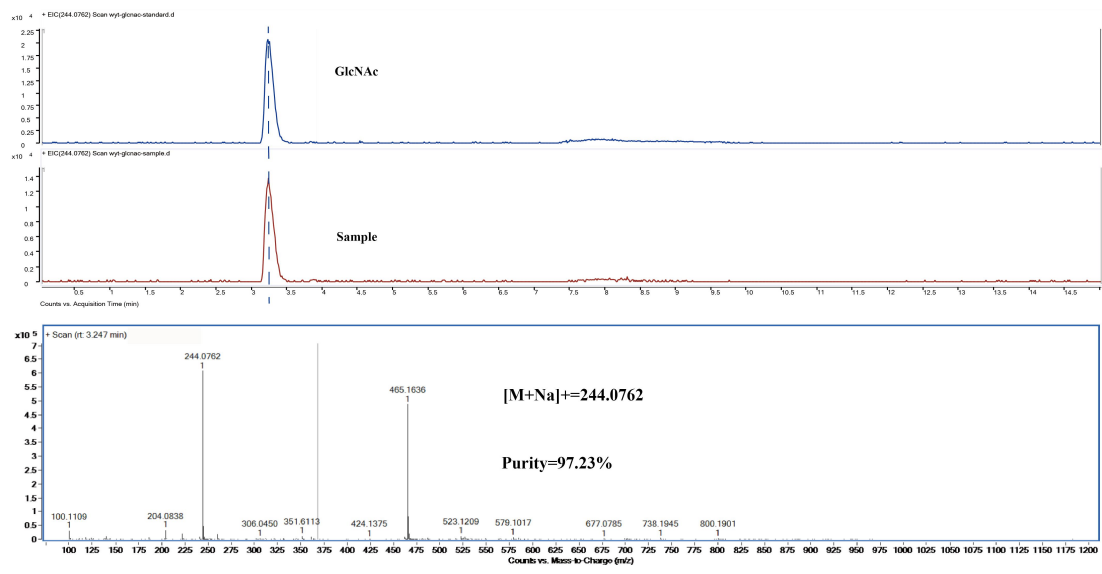

**Figure S16. HPLC-MS detection of GlcNAc in purified sample for *NfBNGS4*, related to Figure 7.**

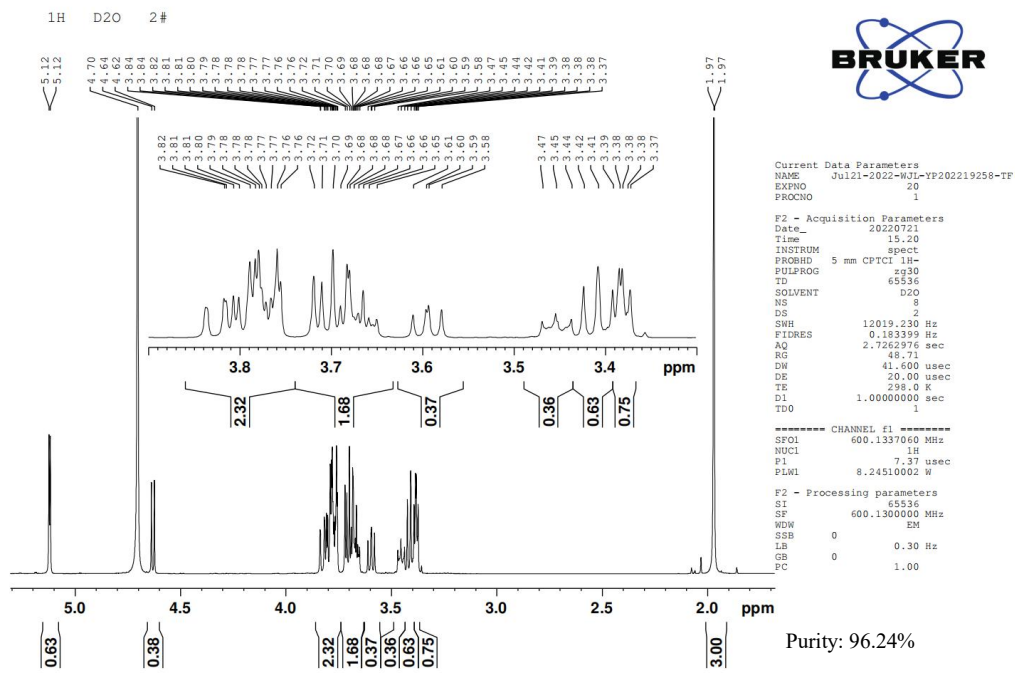

Figure S17. <sup>1</sup>HMR detection of GlcNAc in purified sample for *N/BNGS4*, related to Figure 7.

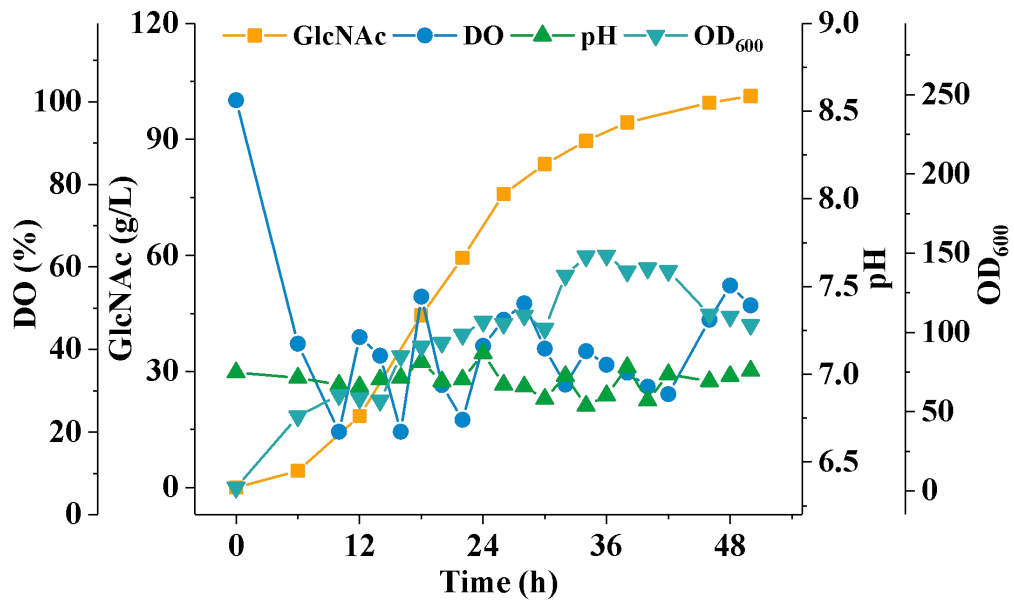

Figure S18. Production of GlcNAc in fed-batch fermentation in a 50-L bioreactor at 42°C by *TtBNGS4*, related to Figure 7.

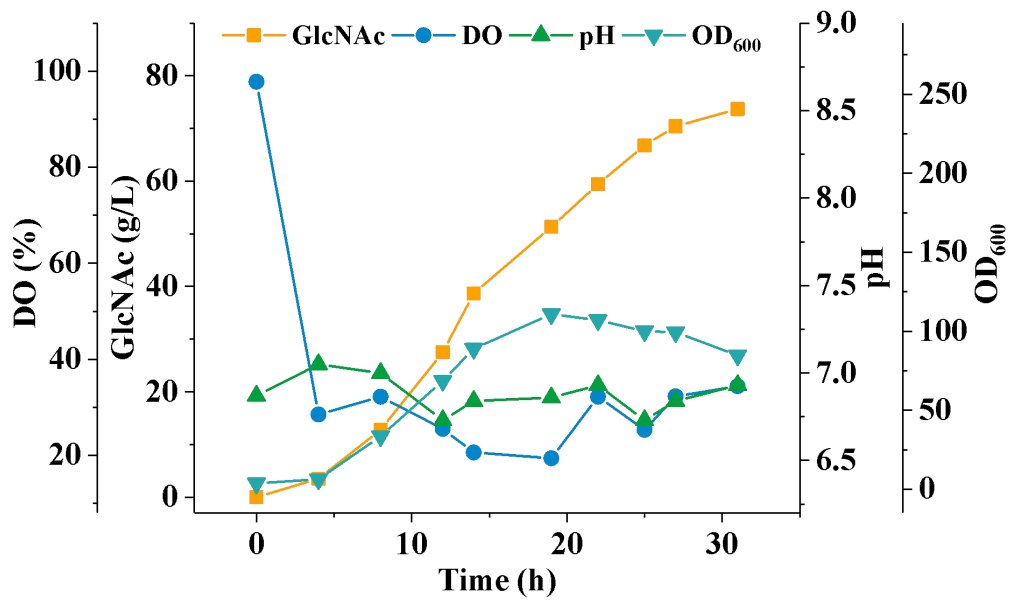

Figure S19. Production of GlcNAc in fed-batch fermentation in a 50-L bioreactor at 50°C by *TtBNGS3*, related to Figure 7.

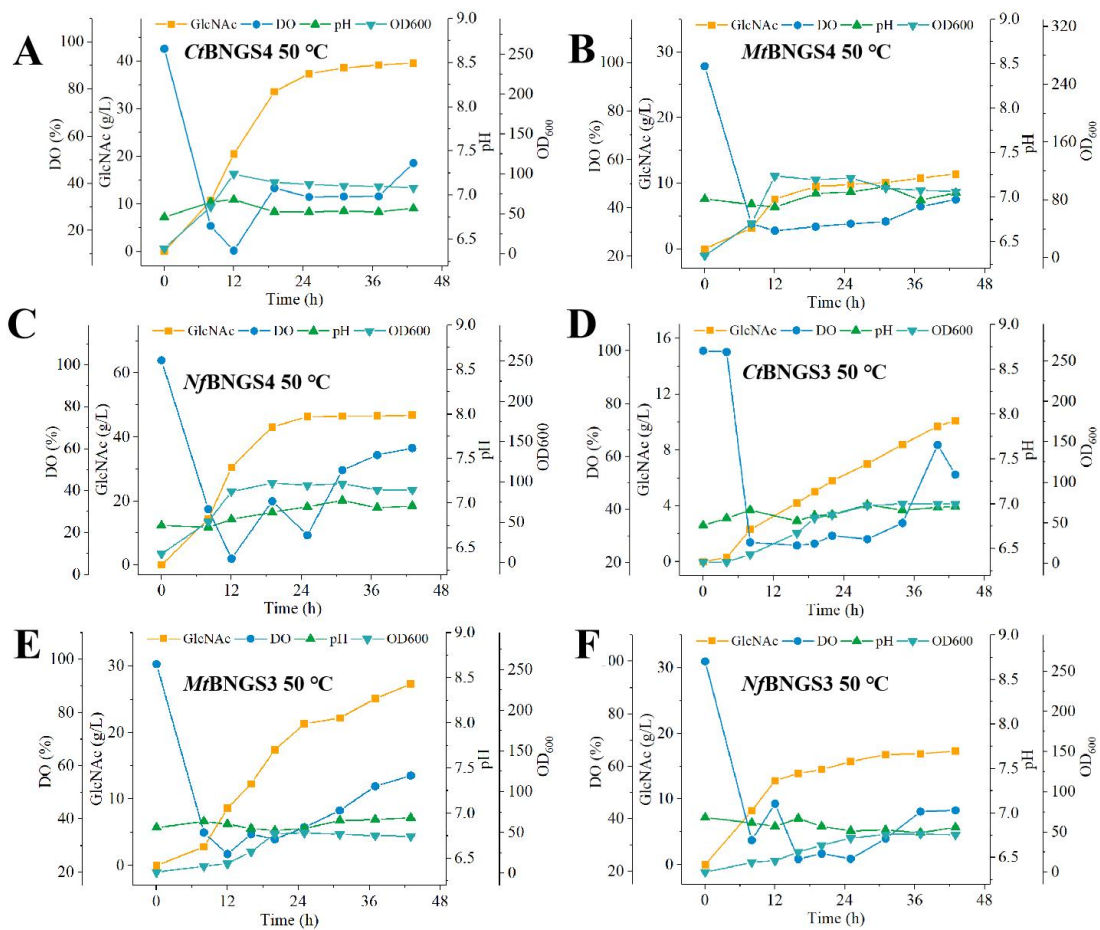

**Figure S20. Production of GlcNAc in fed-batch fermentation in a 50-L bioreactor at 50 °C, related to Figure 7.**

(A) Fed-batch fermentation of *Ct*BNGS4 in a 50-L bioreactor at 50 °C. OD<sub>600</sub>, optical density at 600 nm.

(B) Fed-batch fermentation of *Mt*BNGS4 in a 50-L bioreactor at 50 °C. OD<sub>600</sub>, optical density at 600 nm.

(C) Fed-batch fermentation of *Nt*BNGS4 in a 50-L bioreactor at 50 °C. OD<sub>600</sub>, optical density at 600 nm.

(D) Fed-batch fermentation of *Ct*BNGS3 in a 50-L bioreactor at 50 °C. OD<sub>600</sub>, optical density at 600 nm.

(E) Fed-batch fermentation of *Mt*BNGS3 in a 50-L bioreactor at 50 °C. OD<sub>600</sub>, optical density at 600 nm.

(F) Fed-batch fermentation of *Nt*BNGS3 in a 50-L bioreactor at 50 °C. OD<sub>600</sub>, optical density at 600 nm.

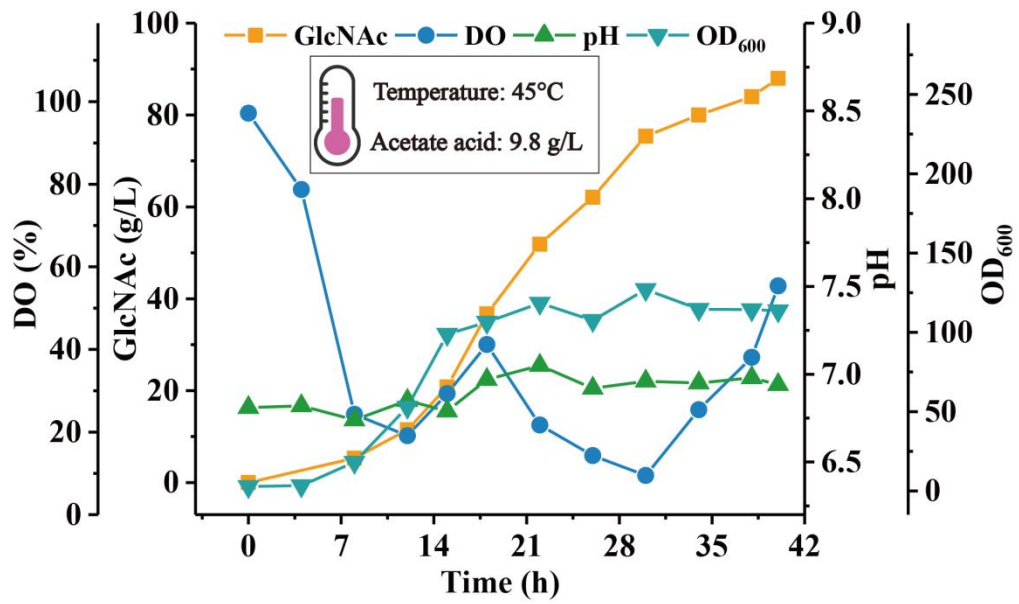

Figure S21. Production of GlcNAc in fed-batch fermentation in a 50-L bioreactor at 45°C by *TtBNGS4*, related to Figure 7.

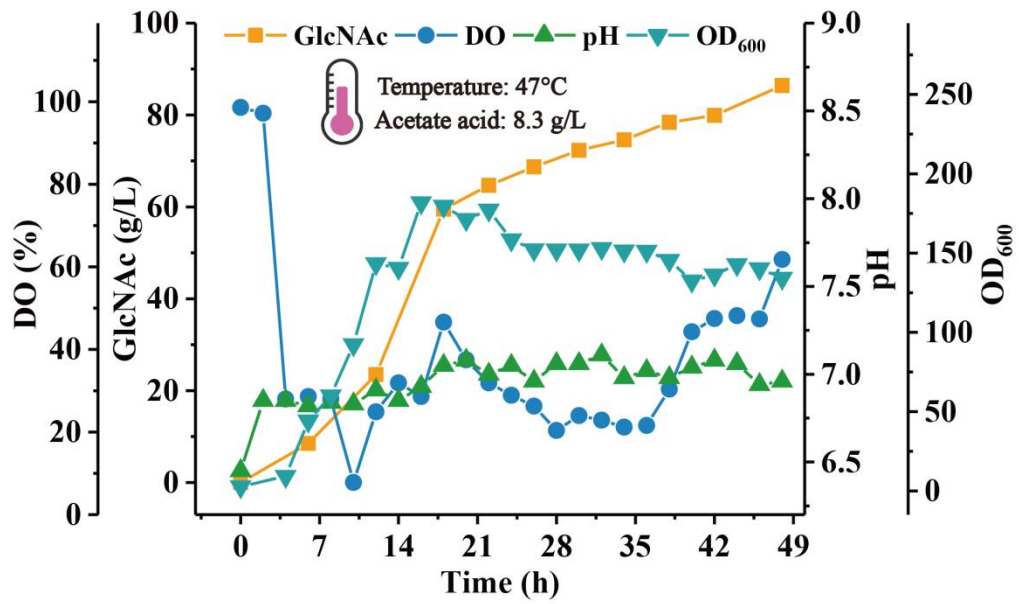

Figure S22. Production of GlcNAc in fed-batch fermentation in a 50-L bioreactor at 47°C by *TtBNGS4*, related to Figure 7.

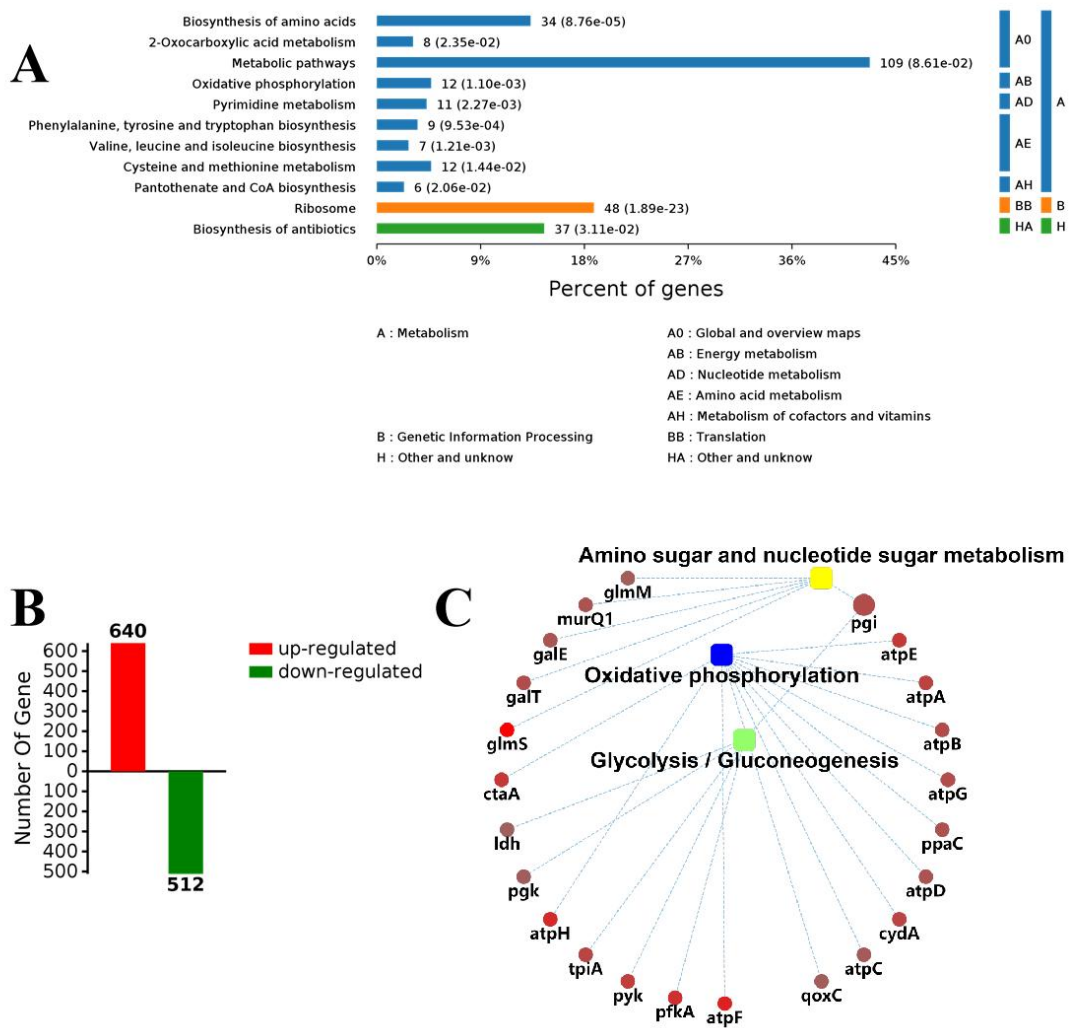

Figure S23. Transcriptome analysis comparison with BNGS4 and *N*/BNGS4 in key metabolic pathway, related to Figure 8.



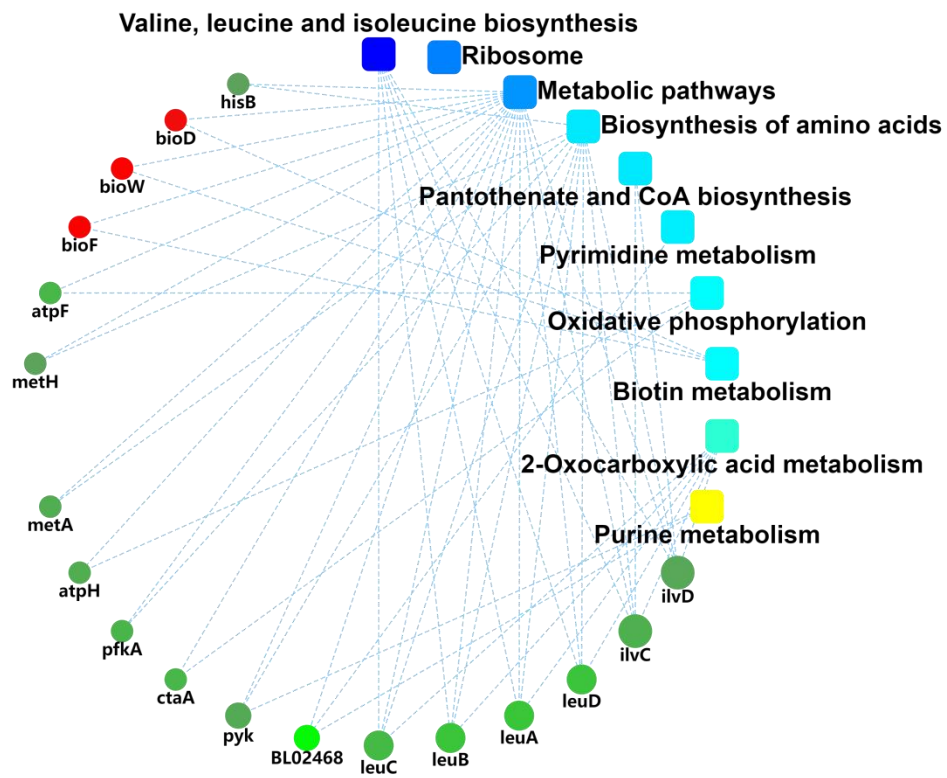

Figure S24. Transcriptome analysis comparison with *Tt*BNGS4 and *Nf*BNGS4 in key metabolic pathway, related to Figure 8.

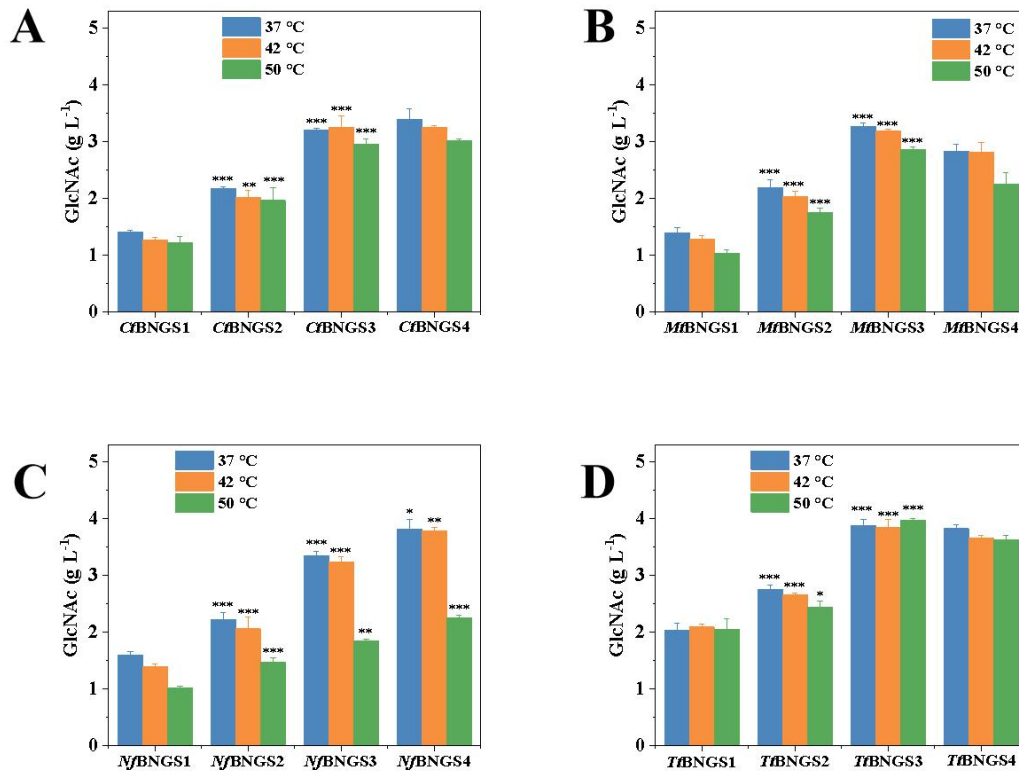

**Figure S25. Shake-flask fermentation, related to Figure 7.**

(A) Shake-flask fermentation of *Ct*BNGS1, *Ct*BNGS2, *Ct*BNGS3, and *Ct*BNGS4 at 37°C, 42°C, and 50°C, respectively. Triplicate experiments were carried out for physiological measurements, and error bars represent standard deviation. \* $p < 0.05$ , \*\* $p < 0.01$ , \*\*\* $p < 0.001$  as determined by t test.

(B) Shake-flask fermentation of *Mt*BNGS1, *Mt*BNGS2, *Mt*BNGS3, and *Mt*BNGS4 at 37°C, 42°C, and 50°C, respectively. Triplicate experiments were carried out for physiological measurements, and error bars represent standard deviation. \* $p < 0.05$ , \*\* $p < 0.01$ , \*\*\* $p < 0.001$  as determined by t test.

(C) Shake-flask fermentation of *Nf*BNGS1, *Nf*BNGS2, *Nf*BNGS3, and *Nf*BNGS4 at 37°C, 42°C, and 50°C, respectively. Triplicate experiments were carried out for physiological measurements, and error bars represent standard deviation. \* $p < 0.05$ , \*\* $p < 0.01$ , \*\*\* $p < 0.001$  as determined by t test.

(D) Shake-flask fermentation of *Tt*BNGS1, *Tt*BNGS2, *Tt*BNGS3, and *Tt*BNGS4 at 37°C, 42°C, and 50°C, respectively. Triplicate experiments were carried out for physiological measurements, and error bars represent standard deviation. \* $p < 0.05$ , \*\* $p < 0.01$ , \*\*\* $p < 0.001$  as determined by t test.

## Supplementary Tables

**Table S1 Screened GNA1 candidate thermophilic enzymes based on thermophilic fungi database, related to Figure 2.**

| Number | Genome Acc. No.          | Score | E-Value     | Protein ID and Annotation |
|--------|--------------------------|-------|-------------|---------------------------|
| 1      | Talth1p4.representatives | 308   | 2.16E-35    | Talth1p4_004467           |
| 2      | Dacth1p7.accepted        | 305   | 1.07E-34    | Dacth1p7_004956           |
| 3      | Calth2p4.representatives | 303   | 1.26E-34    | Calth2p4_002930           |
| 4      | Thela2p4.representatives | 302   | 1.73E-34    | Thela2p4_001470           |
| 5      | Paeby1p7.accepted        | 298   | 5.80E-34    | Paeby1p7_013401           |
| 6      | Theau2p4.representatives | 296   | 2.33E-33    | Theau2p4_007854           |
| 7      | Talth1p4.representatives | 289   | 3.68E-32    | Talth1p4_001395           |
| 8      | Thela2p4.representatives | 287   | 6.43E-32    | Thela2p4_003400           |
| 9      | Rhipu1p4.representatives | 284   | 8.01E-32    | Rhipu1p4_009376           |
| 10     | Paeby1p7.accepted        | 288   | 8.23E-32    | Paeby1p7_002255           |
| 11     | Acrth2p7.accepted        | 283   | 9.43E-32    | Acrth2p7_012607           |
| 12     | Thest2p7.accepted        | 282   | 1.53E-31    | Thest2p7_018758           |
| 13     | Corth2p4.representatives | 282   | 1.67E-31    | Corth2p4_004224           |
| 14     | Myrth2p4.representatives | 278   | 5.62E-31    | Myrth2p4_006746           |
| 15     | Spoth2p4.representatives | 278   | 6.06E-31    | Spoth2p4_009953           |
| 16     | Scyth2p4.representatives | 277   | 8.16E-31    | Scyth2p4_002266           |
| 17     | Chath2p7.accepted        | 277   | 1.08E-30    | Chath2p7_007107           |
| 18     | Thite2p4.representatives | 275   | 1.90E-30    | Thite2p4_002933           |
| 19     | Thiau2p7.accepted        | 274   | 2.40E-30    | Thiau2p7_011322           |
| 20     | Humhy2p7.accepted        | 263   | 1.18E-28    | Humhy2p7_018757           |
| 21     | Calth2p4.representatives | 242   | 1.45E-25    | Calth2p4_007804           |
| 22     | Acrth2p7.accepted        | 239   | 5.00E-25    | Acrth2p7_011569           |
| 23     | CBS620.91p7.accepted     | 234   | 5.06E-25    | CBS620.91p7_001600        |
| 24     | Rhipu1p4.representatives | 210   | 1.05E-20    | Rhipu1p4_001988           |
| 25     | Calth2p4.representatives | 96    | 0.000257906 | Calth2p4_004126           |
| 26     | Humhy2p7.accepted        | 95    | 0.000458471 | Humhy2p7_011674           |
| 27     | Rhipu1p4.representatives | 91    | 0.00128448  | Rhipu1p4_002247           |
| 28     | Chath2p7.accepted        | 88    | 0.00321645  | Chath2p7_017277           |
| 29     | Corth2p4.representatives | 86    | 0.00374988  | Corth2p4_002251           |
| 30     | CBS620.91p7.accepted     | 85    | 0.00878263  | CBS620.91p7_000313        |
| 31     | Myrth2p4.representatives | 83    | 0.00968691  | Myrth2p4_005675           |

Note: Number 1, 2, 8, 10, 11, 14, 16, and 17 have been screened.

**Table S2 Tm index and aliphatic index of GNA1 candidate thermophilic enzymes based on Uniprot database, related to Figure 2.**

| Number | GNA1 enzyme from                   | Tm Index | Aliphatic Index |
|--------|------------------------------------|----------|-----------------|
| 1      | <i>Kluyveromyces lactis</i>        | 2.3148   | 112.3404        |
| 2      | <i>Phycomyces blakesleeanus</i>    | 1.9162   | 111.6667        |
| 3      | <i>Aphanomyces astaci</i>          | 2.4129   | 108.2877        |
| 4      | <i>Kuraishia capsulata</i>         | 1.8453   | 107.0395        |
| 5      | <i>Cryptococcus gattii</i> CA1280  | 1.8672   | 107.0186        |
| 6      | <i>Panicum hallii</i>              | 1.7310   | 106.8987        |
| 7      | <i>Anaeromyces robustus</i>        | 1.8783   | 105.7143        |
| 8      | <i>Hymenolepis nana</i>            | 2.0458   | 103.4737        |
| 9      | <i>Nadsonia fulvescens</i>         | 2.7142   | 103.3533        |
| 10     | <i>Aureobasidium pullulans</i>     | 1.9133   | 102.7517        |
| 11     | <i>Magnaportheopsis poae</i>       | 2.0930   | 102.1637        |
| 12     | <i>Oncopeltus fasciatus</i>        | 2.4285   | 101.8782        |
| 13     | <i>Echinococcus multilocularis</i> | 2.1024   | 101.7978        |
| 14     | <i>Lachancea meyersii</i>          | 2.0759   | 100.3822        |
| 15     | <i>Saccharomyces cerevisiae</i>    | 1.6119   | 94.3396         |

Note: Number 1, 2, 3, 5, 6, 8, 9, and 11 have been screened.

The TI (Tm Index) method is provided as a free software platform composed of a dipeptide Tm (melting temperature) weight value table and a web-based interface (Online Tm Predictor, see also <http://tm.life.nthu.edu.tw/>). The higher the TI value, the more stable the enzyme is.

The aliphatic index shows the thermal stability of the enzyme sequences and larger index confirmed the enzyme for higher stability.

**Table S3 Enzyme kinetic parameters of *Tt*GNA1, *Mt*GNA1, *Nf*GNA1, and *Ct*GNA1, related to Figure 4 and STAR Methods.**

| Enzyme         | GlcN-6P<br>$K_m$ (mM) | Ac-CoA<br>$K_m$<br>(mM) | GlcN-6P<br>$k_{cat}$<br>(s <sup>-1</sup> ) | Ac-CoA<br>$k_{cat}$<br>(s <sup>-1</sup> ) | GlcN-6P<br>$k_{cat}/K_m$<br>(s <sup>-1</sup> mM <sup>-1</sup> ) | Ac-CoA<br>$k_{cat}/K_m$<br>(s <sup>-1</sup> mM <sup>-1</sup> ) |
|----------------|-----------------------|-------------------------|--------------------------------------------|-------------------------------------------|-----------------------------------------------------------------|----------------------------------------------------------------|
| <i>Tt</i> GNA1 | 0.45                  | 0.49                    | 840.40                                     | 792.53                                    | 1867.56                                                         | 1671.41                                                        |
| <i>Nf</i> GNA1 | 1.67                  | 2.11                    | 538.61                                     | 504.27                                    | 322.52                                                          | 238.99                                                         |
| <i>Ct</i> GNA1 | 0.26                  | 0.36                    | 472.53                                     | 568.90                                    | 1817.43                                                         | 1580.29                                                        |
| <i>Mt</i> GNA1 | 0.35                  | 0.83                    | 617.71                                     | 633.94                                    | 1764.88                                                         | 763.78                                                         |
| <i>Sc</i> GNA1 | 1.08                  | 1.76                    | 181.39                                     | 279.59                                    | 167.95                                                          | 158.86                                                         |

**Table S4 Putative stabilizing factors of *Tt*GNA1, *Mt*GNA1, *Nf*GNA1, *Sc*GNA1, and *Ct*GNA1, related to Figure 5 and STAR Methods.**

| Enzyme         | Numbe of helice | $\beta$ -branched residue content in helices (%) | $\beta$ -branched residue content in the whole sequence (%) |
|----------------|-----------------|--------------------------------------------------|-------------------------------------------------------------|
| <i>Tt</i> GNA1 | 8               | 15.3                                             | 17.75                                                       |
| <i>Nf</i> GNA1 | 7               | 19.3                                             | 22.16                                                       |
| <i>Mt</i> GNA1 | 7               | 11.8                                             | 21.35                                                       |
| <i>Ct</i> GNA1 | 7               | 14.7                                             | 16.85                                                       |
| <i>Sc</i> GNA1 | 6               | 17.9                                             | 23.90                                                       |

**Table S5 Flexibility indices of *Tt*GNA1, *Mt*GNA1, *Nf*GNA1, and *Ct*GNA1, related to Figure 5 and STAR Methods.**

| Enzyme         | F      |
|----------------|--------|
| <i>Tt</i> GNA1 | 0.9703 |
| <i>Nf</i> GNA1 | 0.9839 |
| <i>Mt</i> GNA1 | 0.9866 |
| <i>Ct</i> GNA1 | 0.9862 |

**Table S6 The previous reported strains for GlcNAc production with glucose as the sole carbon source, related to Discussion.**

| <b>Strains</b>                                                   | <b>Fermentation temperature (°C)</b>       | <b>GlcNAc titers (g/L)</b> | <b>Reference</b> |
|------------------------------------------------------------------|--------------------------------------------|----------------------------|------------------|
| <i>Escherichia coli</i> 7107-607                                 | 37                                         | 110                        | [1]              |
| <i>Saccharomyces cerevisiae</i> 2627MY                           | 30                                         | 3.114                      | [2]              |
| <i>Bacillus subtilis</i> FMIP34                                  | 37                                         | 87.5                       | [3]              |
| <i>Corynebacterium glutamicum</i> CGGN4mdhM7-GNA1-CggIm S-RamAMA | 30                                         | 117.1 ± 1.9                | [4]              |
| <i>Bacillus licheniformis</i> NfBNGS4                            | 42                                         | 119.3                      | This study       |
| <i>Bacillus licheniformis</i> TfBNGS4                            | 47                                         | 86.4                       | This study       |
| <i>Bacillus licheniformis</i> TfBNGS4                            | From 42 to 50 with temperature programming | 83                         | This study       |



**Table S7 Strains used in this study, related to STAR Methods.**

| Name                                      | Characteristics                                                                                       | Source           |
|-------------------------------------------|-------------------------------------------------------------------------------------------------------|------------------|
| <i>B. licheniformis</i> MW3               | Mutant strains of <i>B. licheniformis</i> ATCC14580 ( $\Delta hsdR1$ , $\Delta hsdR2$ )               | Laboratory stock |
| BNGS1                                     | <i>B. licheniformis</i> MW3 derivate, MW3 $\Delta nagP1\Delta nagP2\Delta gamA\Delta nagA\Delta nagB$ | This work        |
| ScBNGS1                                   | BNGS1 derivate, harboring pHY300PLK-P <sub>als</sub> - <i>Scgna1</i>                                  | This work        |
| ScopBNGS1                                 | BNGS1 derivate, harboring pHY300PLK-P <sub>als</sub> - <i>Scopgna1</i>                                | This work        |
| BNGS1-P <sub>43</sub> - <i>ScopGNA1</i>   | BNGS1 derivate, harboring pHY300PLK-P <sub>43</sub> - <i>Scopgna1</i>                                 | This work        |
| BNGS1-P <sub>aprE</sub> - <i>ScopGNA1</i> | BNGS1 derivate, harboring pHY300PLK-P <sub>aprE</sub> - <i>Scopgna1</i>                               | This work        |
| BNGS1-P <sub>st</sub> - <i>ScopGNA1</i>   | BNGS1 derivate, harboring pHY300PLK-P <sub>st</sub> - <i>Scopgna1</i>                                 | This work        |
| BNGS1-P <sub>big</sub> - <i>ScopGNA1</i>  | BNGS1 derivate, harboring pHY300PLK-P <sub>big</sub> - <i>Scopgna1</i>                                | This work        |
| TtBNGS1                                   | BNGS1 derivate, harboring pHY300PLK-P <sub>als</sub> - <i>Ttgna1</i>                                  | This work        |
| MtBNGS1                                   | BNGS1 derivate, harboring pHY300PLK-P <sub>als</sub> - <i>Mtgna1</i>                                  | This work        |
| CtBNGS1                                   | BNGS1 derivate, harboring pHY300PLK-P <sub>als</sub> - <i>Ctgna1</i>                                  | This work        |
| NfBNGS1                                   | BNGS1 derivate, harboring pHY300PLK-P <sub>als</sub> - <i>Nfgna1</i>                                  | This work        |
| KlBNGS1                                   | BNGS1 derivate, harboring pHY300PLK-P <sub>als</sub> - <i>Klgna1</i>                                  | This work        |
| PbBNGS1                                   | BNGS1 derivate, harboring pHY300PLK-P <sub>als</sub> - <i>Pbgna1</i>                                  | This work        |
| AaBNGS1                                   | BNGS1 derivate, harboring pHY300PLK-P <sub>als</sub> - <i>Aagna1</i>                                  | This work        |
| CgBNGS1                                   | BNGS1 derivate, harboring pHY300PLK-P <sub>als</sub> - <i>Cggna1</i>                                  | This work        |
| PhBNGS1                                   | BNGS1 derivate, harboring pHY300PLK-P <sub>als</sub> - <i>Phgna1</i>                                  | This work        |
| HnBNGS1                                   | BNGS1 derivate, harboring pHY300PLK-P <sub>als</sub> - <i>Hngna1</i>                                  | This work        |
| MpBNGS1                                   | BNGS1 derivate, harboring pHY300PLK-P <sub>als</sub> - <i>Mpgna1</i>                                  | This work        |
| LfBNGS1                                   | BNGS1 derivate, harboring pHY300PLK-P <sub>als</sub> - <i>Lfgna1</i>                                  | This work        |
| RfBNGS1                                   | BNGS1 derivate, harboring                                                                             | This work        |

|                   |                                                                                                                                                                                                   |           |
|-------------------|---------------------------------------------------------------------------------------------------------------------------------------------------------------------------------------------------|-----------|
|                   | pHY300PLK- <i>P<sub>als</sub>-Rfgna1</i>                                                                                                                                                          |           |
| <i>Cf</i> BNGS1   | BNGS1 derivate, harboring<br>pHY300PLK- <i>P<sub>als</sub>-Cfjna1</i>                                                                                                                             | This work |
| <i>Fn</i> BNGS1   | BNGS1 derivate, harboring<br>pHY300PLK- <i>P<sub>als</sub>-Fngna1</i>                                                                                                                             | This work |
| <i>Td</i> BNGS1   | BNGS1 derivate, harboring<br>pHY300PLK- <i>P<sub>als</sub>-Tdgna1</i>                                                                                                                             | This work |
| <i>Tl</i> BNGS1   | BNGS1 derivate, harboring<br>pHY300PLK- <i>P<sub>als</sub>-Tljna1</i>                                                                                                                             | This work |
| <i>Rb</i> BNGS1   | BNGS1 derivate, harboring<br>pHY300PLK- <i>P<sub>als</sub>-Rbgna1</i>                                                                                                                             | This work |
| <i>At</i> BNGS1   | BNGS1 derivate, harboring<br>pHY300PLK- <i>P<sub>als</sub>-Atjna1</i>                                                                                                                             | This work |
| <i>Mf</i> BNGS1   | BNGS1 derivate, harboring<br>pHY300PLK- <i>P<sub>als</sub>-Mfgna1</i>                                                                                                                             | This work |
| BNGS2             | <i>B. licheniformis</i> MW3 derivate,<br>MW3 $\Delta$ nagP1 $\Delta$ nagP2 $\Delta$ gamA $\Delta$ nagA $\Delta$ nagB:: <i>P<sub>als</sub>-BlgImS</i>                                              | This work |
| <i>Scop</i> BNGS2 | BNGS2 derivate, harboring<br>pHY300PLK- <i>P<sub>als</sub>-Scopjna1</i>                                                                                                                           | This work |
| <i>Tt</i> BNGS2   | BNGS2 derivate, harboring<br>pHY300PLK- <i>P<sub>als</sub>-Ttjna1</i>                                                                                                                             | This work |
| <i>Mt</i> BNGS2   | BNGS2 derivate, harboring<br>pHY300PLK- <i>P<sub>als</sub>-Mtgna1</i>                                                                                                                             | This work |
| <i>Ct</i> BNGS2   | BNGS2 derivate, harboring<br>pHY300PLK- <i>P<sub>als</sub>-Ctgna1</i>                                                                                                                             | This work |
| <i>Nf</i> BNGS2   | BNGS2 derivate, harboring<br>pHY300PLK- <i>P<sub>als</sub>-Nfgna1</i>                                                                                                                             | This work |
| BNGS3             | <i>B. licheniformis</i> MW3 derivate,<br>MW3 $\Delta$ nagP1 $\Delta$ nagP2 $\Delta$ gamA $\Delta$ nagA $\Delta$ nagB $\Delta$ als<br><i>S<math>\Delta</math>alsD::<p<sub>als-BlgImS</p<sub></i>   | This work |
| <i>Scop</i> BNGS3 | BNGS1 derivate, harboring<br>pHY300PLK- <i>P<sub>als</sub>-Scopjna1</i>                                                                                                                           | This work |
| <i>Tt</i> BNGS3   | BNGS3 derivate, harboring<br>pHY300PLK- <i>P<sub>als</sub>-Ttjna1</i>                                                                                                                             | This work |
| <i>Mt</i> BNGS3   | BNGS3 derivate, harboring<br>pHY300PLK- <i>P<sub>als</sub>-Mtgna1</i>                                                                                                                             | This work |
| <i>Ct</i> BNGS3   | BNGS3 derivate, harboring<br>pHY300PLK- <i>P<sub>als</sub>-Ctgna1</i>                                                                                                                             | This work |
| <i>Nf</i> BNGS3   | BNGS3 derivate, harboring<br>pHY300PLK- <i>P<sub>als</sub>-Nfgna1</i>                                                                                                                             | This work |
| <i>Tt</i> BNGS4   | BNGS3 derivate,<br>MW3 $\Delta$ nagP1 $\Delta$ nagP2 $\Delta$ gamA $\Delta$ nagA $\Delta$ nagB $\Delta$ als<br><i>S<math>\Delta</math>alsD::<p<sub>als-BlgImS::P<sub>als</sub>-Ttjna1</p<sub></i> | This work |

|                                       |                                                                                                                                                                                    |                  |
|---------------------------------------|------------------------------------------------------------------------------------------------------------------------------------------------------------------------------------|------------------|
| <i>Mt</i> BNGS4                       | BNGS3 derivate,<br>MW3 $\Delta$ nagP1 $\Delta$ nagP2 $\Delta$ gamA $\Delta$ nagA $\Delta$ nagB $\Delta$ als<br>S $\Delta$ alsD::P <sub>als</sub> -BlgImS::P <sub>als</sub> -Mtgna1 | This work        |
| <i>Ct</i> BNGS4                       | BNGS3 derivate,<br>MW3 $\Delta$ nagP1 $\Delta$ nagP2 $\Delta$ gamA $\Delta$ nagA $\Delta$ nagB $\Delta$ als<br>S $\Delta$ alsD::P <sub>als</sub> -BlgImS::P <sub>als</sub> -Ctgna1 | This work        |
| <i>Nf</i> BNGS4                       | BNGS3 derivate,<br>MW3 $\Delta$ nagP1 $\Delta$ nagP2 $\Delta$ gamA $\Delta$ nagA $\Delta$ nagB $\Delta$ als<br>S $\Delta$ alsD::P <sub>als</sub> -BlgImS::P <sub>als</sub> -Nfgna1 | This work        |
| <i>E. coli</i> BL21 (DE3)             | Host for gene expression and cloning the <i>gna1</i> gene                                                                                                                          | Laboratory stock |
| <i>E. coli</i> S17-1                  | Conjugative strain able to host $\lambda$ - <i>pir</i> -dependent plasmids                                                                                                         | Laboratory stock |
| <i>E. coli</i> BL21(pETDuet-Mtgna1)   | <i>E. coli</i> BL21(DE3) harboring pETDuet-Mtgna1                                                                                                                                  | This study       |
| <i>E. coli</i> BL21(pETDuet-Nfgna1)   | <i>E. coli</i> BL21(DE3) harboring pETDuet-Nfgna1                                                                                                                                  | This study       |
| <i>E. coli</i> BL21(pETDuet-Ctgna1)   | <i>E. coli</i> BL21(DE3) harboring pETDuet-Ctgna1                                                                                                                                  | This study       |
| <i>E. coli</i> BL21(pETDuet-Ttgna1)   | <i>E. coli</i> BL21(DE3) harboring pETDuet-Ttgna1                                                                                                                                  | This study       |
| <i>E. coli</i> BL21(pETDuet-Scopgna1) | <i>E. coli</i> BL21(DE3) harboring pETDuet-Scopgna1                                                                                                                                | This study       |

**Table S8 Plasmids used in this study, related to STAR Methods.**

| Name                                          | Characteristics                                                                                           | Source           |
|-----------------------------------------------|-----------------------------------------------------------------------------------------------------------|------------------|
| pHY300PLK                                     | <i>E.coli-B.licheniformis</i> shuttle vector, <i>Amp<sup>r</sup></i> , <i>Tet<sup>r</sup></i>             | Laboratory stock |
| pKVM1                                         | Gene knockout and insertion vector, <i>Ery<sup>r</sup></i> , <i>Amp<sup>r</sup></i>                       | Laboratory stock |
| pETDuet-1                                     | <i>PT7</i> , overexpression vector, <i>Amp<sup>r</sup></i>                                                | Laboratory stock |
| pETDuet- <i>Mtgna1</i>                        | pETDuet-1 contained the <i>Mtgna1</i> gene, <i>Amp<sup>r</sup></i>                                        | This study       |
| pETDuet- <i>Nfgna1</i>                        | pETDuet-1 contained the <i>Nfgna1</i> gene, <i>Amp<sup>r</sup></i>                                        | This study       |
| pETDuet- <i>Ctgna1</i>                        | pETDuet-1 contained the <i>Ctgna1</i> gene, <i>Amp<sup>r</sup></i>                                        | This study       |
| pETDuet- <i>Ttgna1</i>                        | pETDuet-1 contained the <i>Ttgna1</i> gene, <i>Amp<sup>r</sup></i>                                        | This study       |
| pETDuet- <i>Scopgna1</i>                      | pETDuet-1 contained the <i>Scopgna1</i> gene, <i>Amp<sup>r</sup></i>                                      | This study       |
| pHY300PLK-P <sub>als</sub> - <i>Scopgna1</i>  | pHY300PLK contained P <sub>als</sub> - <i>Scopgna1</i> , <i>Amp<sup>r</sup></i> , <i>Tet<sup>r</sup></i>  | This study       |
| pHY300PLK-P <sub>43</sub> - <i>Scopgna1</i>   | pHY300PLK contained P <sub>43</sub> - <i>Scopgna1</i> , <i>Amp<sup>r</sup></i> , <i>Tet<sup>r</sup></i>   | This study       |
| pHY300PLK-P <sub>aprE</sub> - <i>Scopgna1</i> | pHY300PLK contained P <sub>aprE</sub> - <i>Scopgna1</i> , <i>Amp<sup>r</sup></i> , <i>Tet<sup>r</sup></i> | This study       |
| pHY300PLK-P <sub>st</sub> - <i>Scopgna1</i>   | pHY300PLK contained P <sub>st</sub> - <i>Scopgna1</i> , <i>Amp<sup>r</sup></i> , <i>Tet<sup>r</sup></i>   | This study       |
| pHY300PLK-P <sub>big</sub> - <i>Scopgna1</i>  | pHY300PLK contained P <sub>big</sub> - <i>Scopgna1</i> , <i>Amp<sup>r</sup></i> , <i>Tet<sup>r</sup></i>  | This study       |
| pHY300PLK-P <sub>als</sub> - <i>Scgna1</i>    | pHY300PLK contained P <sub>als</sub> - <i>Scgna1</i> , <i>Amp<sup>r</sup></i> , <i>Tet<sup>r</sup></i>    | This study       |
| pHY300PLK-P <sub>als</sub> - <i>Ttgna1</i>    | pHY300PLK contained P <sub>als</sub> - <i>Ttgna1</i> , <i>Amp<sup>r</sup></i> , <i>Tet<sup>r</sup></i>    | This study       |
| pHY300PLK-P <sub>als</sub> - <i>Ctgna1</i>    | pHY300PLK contained P <sub>als</sub> - <i>Ctgna1</i> , <i>Amp<sup>r</sup></i> , <i>Tet<sup>r</sup></i>    | This study       |
| pHY300PLK-P <sub>als</sub> - <i>Mtgna1</i>    | pHY300PLK contained P <sub>als</sub> - <i>Mtgna1</i> , <i>Amp<sup>r</sup></i> , <i>Tet<sup>r</sup></i>    | This study       |
| pHY300PLK-P <sub>als</sub> - <i>Nfgna1</i>    | pHY300PLK contained P <sub>als</sub> - <i>Nfgna1</i> , <i>Amp<sup>r</sup></i> , <i>Tet<sup>r</sup></i>    | This study       |
| pHY300PLK-P <sub>als</sub> - <i>Klgna1</i>    | pHY300PLK contained P <sub>als</sub> - <i>Klgna1</i> , <i>Amp<sup>r</sup></i> , <i>Tet<sup>r</sup></i>    | This study       |
| pHY300PLK-P <sub>als</sub> - <i>Pbgna1</i>    | pHY300PLK contained P <sub>als</sub> - <i>Pbgna1</i> , <i>Amp<sup>r</sup></i> , <i>Tet<sup>r</sup></i>    | This study       |
| pHY300PLK-P <sub>als</sub> - <i>Aagna1</i>    | pHY300PLK contained P <sub>als</sub> - <i>Aagna1</i> , <i>Amp<sup>r</sup></i> , <i>Tet<sup>r</sup></i>    | This study       |
| pHY300PLK-P <sub>als</sub> - <i>Cgna1</i>     | pHY300PLK contained P <sub>als</sub> - <i>Cgna1</i> , <i>Amp<sup>r</sup></i> , <i>Tet<sup>r</sup></i>     | This study       |
| pHY300PLK-P <sub>als</sub> - <i>Phgna1</i>    | pHY300PLK contained P <sub>als</sub> - <i>Phgna1</i> , <i>Amp<sup>r</sup></i> , <i>Tet<sup>r</sup></i>    | This study       |
| pHY300PLK-P <sub>als</sub> - <i>Hngna1</i>    | pHY300PLK contained P <sub>als</sub> - <i>Hngna1</i> , <i>Amp<sup>r</sup></i> , <i>Tet<sup>r</sup></i>    | This study       |
| pHY300PLK-P <sub>als</sub> - <i>Mpgna1</i>    | pHY300PLK contained P <sub>als</sub> - <i>Mpgna1</i> , <i>Amp<sup>r</sup></i> , <i>Tet<sup>r</sup></i>    | This study       |
| pHY300PLK-P <sub>als</sub> - <i>Lfgna1</i>    | pHY300PLK contained P <sub>als</sub> - <i>Lfgna1</i> , <i>Amp<sup>r</sup></i> , <i>Tet<sup>r</sup></i>    | This study       |
| pHY300PLK-P <sub>als</sub> - <i>Rfgna1</i>    | pHY300PLK contained P <sub>als</sub> - <i>Rfgna1</i> , <i>Amp<sup>r</sup></i> , <i>Tet<sup>r</sup></i>    | This study       |
| pHY300PLK-P <sub>als</sub> - <i>Cfgna1</i>    | pHY300PLK contained P <sub>als</sub> - <i>Cfgna1</i> , <i>Amp<sup>r</sup></i> , <i>Tet<sup>r</sup></i>    | This study       |
| pHY300PLK-P <sub>als</sub> - <i>Fngna1</i>    | pHY300PLK contained P <sub>als</sub> - <i>Fngna1</i> , <i>Amp<sup>r</sup></i> , <i>Tet<sup>r</sup></i>    | This study       |
| pHY300PLK-P <sub>als</sub> - <i>Tdgna1</i>    | pHY300PLK contained P <sub>als</sub> - <i>Tdgna1</i> , <i>Amp<sup>r</sup></i> , <i>Tet<sup>r</sup></i>    | This study       |
| pHY300PLK-P <sub>als</sub> - <i>Tlgna1</i>    | pHY300PLK contained P <sub>als</sub> - <i>Tlgna1</i> , <i>Amp<sup>r</sup></i> , <i>Tet<sup>r</sup></i>    | This study       |

|                                    |                                                                                                                              |            |
|------------------------------------|------------------------------------------------------------------------------------------------------------------------------|------------|
| pHY300PLK-P <sub>als</sub> -Rbgna1 | pHY300PLK contained P <sub>als</sub> -Rbgna1, Amp <sup>r</sup> , Tet <sup>r</sup>                                            | This study |
| pHY300PLK-P <sub>als</sub> -Atgna1 | pHY300PLK contained P <sub>als</sub> -Atgna1, Amp <sup>r</sup> , Tet <sup>r</sup>                                            | This study |
| pHY300PLK-P <sub>als</sub> -Mfgna1 | pHY300PLK contained P <sub>als</sub> -Mfgna1, Amp <sup>r</sup> , Tet <sup>r</sup>                                            | This study |
| pHY300PLK-P <sub>als</sub> -Klgna1 | pHY300PLK contained P <sub>als</sub> -Klgna1, Amp <sup>r</sup> , Tet <sup>r</sup>                                            | This study |
| pHY300PLK-P <sub>als</sub> -Pbgna1 | pHY300PLK contained P <sub>als</sub> -Pbgna1, Amp <sup>r</sup> , Tet <sup>r</sup>                                            | This study |
| pHY300PLK-P <sub>als</sub> -Aagna1 | pHY300PLK contained P <sub>als</sub> -Aagna1, Amp <sup>r</sup> , Tet <sup>r</sup>                                            | This study |
| pKVMΔnagP1                         | Vector for deletion of <i>nagP1</i> gene in <i>B. licheniformis</i> MW3, Ery <sup>r</sup> , Amp <sup>r</sup>                 | This study |
| pKVMΔnagP2                         | Vector for deletion of <i>nagP2</i> gene in <i>B. licheniformis</i> MW3, Ery <sup>r</sup> , Amp <sup>r</sup>                 | This study |
| pKVMΔnagAB                         | Vector for deletion of <i>nagA</i> and <i>nagB</i> genes in <i>B. licheniformis</i> MW3, Ery <sup>r</sup> , Amp <sup>r</sup> | This study |
| pKVMΔgamA                          | Vector for deletion of <i>gamA</i> gene in <i>B. licheniformis</i> MW3, Ery <sup>r</sup> , Amp <sup>r</sup>                  | This study |
| pKVM-P <sub>als</sub> -glmS        | Vector for overexpression of <i>glmS</i> gene in <i>B. licheniformis</i> MW3, Ery <sup>r</sup> , Amp <sup>r</sup>            | This study |
| pKVMΔalsSD                         | Vector for deletion of <i>alsS</i> and <i>alsD</i> gene in <i>B. licheniformis</i> MW3, Ery <sup>r</sup> , Amp <sup>r</sup>  | This study |

**Abbreviations:** Ery<sup>r</sup>, erythromycin resistance; Amp<sup>r</sup>, ampicillin resistance; Tet<sup>r</sup>, tetracycline resistance.

**Table S9 Primers used in this study, related to STAR Methods.**

| <b>Primer</b>                       | <b>Sequence 5'-3'</b>                              |
|-------------------------------------|----------------------------------------------------|
| nagP-U-F                            | GGTACCCGGGAGCTCATGAATGAGGAGGATCACACAGTC            |
| nagP-U-R                            | GAAGGGGCTTATCTTAGTTAAAACCCCTTTCGATGATATT           |
| nagP-D-F                            | AAAGGGGTTTTAACTAAGATAAGCCCTTCTGAGGAAG              |
| nagP-D-R                            | GCGTCGGGCGATATCGAGGCGGACGAATACTTTGAC               |
| GamP-U-F                            | GGTACCCGGGAGCTCTAGGGTAAAACCGTATGCCGC               |
| GamP-U-R                            | AAGCAACTTCAGTTTTCCGGCATTCTCCTTATGTCAA              |
| GamP-D-F                            | AAGGAGAATGCCGGAAGGTTGCTTTTGAGGAATC                 |
| GamP-D-R                            | GCGTCGGGCGATATCGGAAATTTCTCTGCCAGCTGC               |
| GamA-U-F                            | GGTACCCGGGAGCTCGGTCAAGAGGGAGGGTTCACTT              |
| GamA-U-R                            | TGTCAGTCATTCAATGTTTTTCTCCTTTCCACAAAATAAA           |
| GamA-D-F                            | GGAAAGGAGAAAAACATTGAATGACTGACAAAATCGGTTA           |
| GamA-D-R                            | GCGTCGGGCGATATCTCATATCGGGGATCGGCTT                 |
| nagAB-U-F                           | GGTACCCGGGAGCTCCCGCACGGTCAGCTTA                    |
| nagAB-U-R                           | GGGAATCTTTTTGATACAACTCTAGTTGTCTAGACCAAT            |
| nagAB-D-F                           | ACAAC TAGAGTTGTATCAAAAAAGATTCCACATT                |
| nagAB-D-R                           | GCGTCGGGCGATATCCCTCTTCATATCAATGACGAA               |
| alsSD-U-F                           | GGTACCCGGGAGCTCAATTCGCTTGGCATTCCG                  |
| alsSD-U-R                           | GGAGGAGTGAGGGCTATGAAAAAGCCCTCTTTGAAAAG             |
| alsSD-D-F                           | AGAGGGCTTTTTCATAGCCCTCACTCCTCCATTTTC               |
| alsSD-D-R                           | GCGTCGGGCGATATCTGGGGATAAATCCGGCTTT                 |
| <i>B</i> /glmS-U-F                  | GGTACCCGGGAGCTCCAGAAGACTGAAGAACGAGACA              |
| <i>B</i> /glmS-U-R                  | AATAGGCGTCACCTTAATTTTCTTCCTCCTAAAGTCG              |
| <i>P</i> <sub>als</sub> -glmS-F     | AGGAGGAAGAAAATTAAGGTGACGCCTATTTCACT                |
| <i>P</i> <sub>als</sub> -glmS-R     | TACAATACCACACATAGCCCTCACTCCTCCATT                  |
| <i>B</i> /glmS-D-F                  | GGAGGAGTGAGGGCTATGTGTGGTATTGTAGTTATATTG            |
| <i>B</i> /glmS-D-R                  | GCGTCGGGCGATATCTAATGCAATCGCATAAGAGC                |
| pKVM-GamP-UP-F                      | CCTCGCGTCGGGCGATATCGGATCCTAGGGTAAAACCGTAT<br>GCCGC |
| <i>P</i> <sub>als</sub> -GamP-UP-R  | AATAGGCGTCACCTTTCCGGCATTCTCCTTATGTCAA              |
| Mt-GamP-UP-F                        | AACAGCAGCCAGTAAAAACTGAAGTTGCTTTTGAGGAATC           |
| Ct-GamP-UP-F                        | AACAGCACGCAGTAAAAACTGAAGTTGCTTTTGAGGAATC           |
| Nf-GamP-UP-F                        | AAACTGGCGTTTTAAAAACTGAAGTTGCTTTTGAGGAATC           |
| Tt-GamP-UP-F                        | TATTATCATAAATAAAAAACTGAAGTTGCTTTTGAGGAATC          |
| pKVM-GamP-Down-R                    | CCATGGTACCCGGGAGCTCGAATTCGGAATTTCTCTGCCA<br>GCTGC  |
| GamP-Up- <i>P</i> <sub>als</sub> -F | AAGGAGAATGCCGGAAGGTGACGCCTATTTCACTTTC              |
| GamP-Down-Mt-R                      | AAGCAACTTCAGTTTTTACTGGCTGCTGTTGCTTTTC              |
| GamP-Down-Nf-R                      | AAGCAACTTCAGTTTTTAAAACGCCAGTTTCATCTGC              |
| GamP-Down-Ct-R                      | AAGCAACTTCAGTTTTTACTGCGTGCTGTTGCTTTT               |
| GamP-Down-Tt-R                      | AAGCAACTTCAGTTTTTATTTATGATAATAATGCGCCATT           |

**References:**

1. Deng MD, Severson DK, Grund AD, Wassink SL, Burlingame RP, Berry A, Running JA, Kunesh CA, Song L, Jerrell TA, Rosson RA. 2005. Metabolic engineering of *Escherichia coli* for industrial production of glucosamine and *N*-acetylglucosamine. *Metab. Eng.* 7, 201–214.
2. Lee, S.W., Lee, B.Y., and Oh, M.K. (2018). Combination of three methods to reduce Glucose metabolic rate for improving *N*-acetylglucosamine production in *Saccharomyces cerevisiae*. *J. Agric. Food Chem.* 66, 13191–13198.
3. Niu T, Lv X, Liu Y, Li J, Du G, Ledesma-Amaro R, Liu L. (2021). The elucidation of phosphosugar stress response in *Bacillus subtilis* guides strain engineering for high *N*-acetylglucosamine production. *Biotechnol. Bioeng.* 118, 383–396.
4. Deng, C., Lv, X., Li, J., Zhang, H., Liu, Y., Du, G., Amaro, R.L., and Liu, L. (2021). Synergistic improvement of *N*-acetylglucosamine production by engineering transcription factors and balancing redox cofactors. *Metab. Eng.* 67, 330–346.
